# Supplementary material for: Examining risk factors for self-harm and suicide in LGBTQ+ young people: a systematic review protocol
Source: PubMed Central journal article supplement (PMC6858144; doi:10.1136/bmjopen-2019-031541), 2019-11-11
Supplement: bmjopen-2019-031541.draft_revisions.pdf [file bmjopen-2019-031541.draft_revisions.pdf]

# BMJ Open

BMJ Open is committed to open peer review. As part of this commitment we make the peer review history of every article we publish publicly available.

When an article is published we post the peer reviewers' comments and the authors' responses online. We also post the versions of the paper that were used during peer review. These are the versions that the peer review comments apply to.

The versions of the paper that follow are the versions that were submitted during the peer review process. They are not the versions of record or the final published versions. They should not be cited or distributed as the published version of this manuscript.

BMJ Open is an open access journal and the full, final, typeset and author-corrected version of record of the manuscript is available on our site with no access controls, subscription charges or pay-per-view fees (<http://bmjopen.bmj.com>).

If you have any questions on BMJ Open's open peer review process please email [info.bmjopen@bmj.com](mailto:info.bmjopen@bmj.com)

# BMJ Open

## A systematic review examining risk factors for self-harm and suicide in LGBTQ+ young people

|                               |                                                                                                                                                                                                                                                                     |
|-------------------------------|---------------------------------------------------------------------------------------------------------------------------------------------------------------------------------------------------------------------------------------------------------------------|
| Journal:                      | <i>BMJ Open</i>                                                                                                                                                                                                                                                     |
| Manuscript ID                 | bmjopen-2019-031541                                                                                                                                                                                                                                                 |
| Article Type:                 | Protocol                                                                                                                                                                                                                                                            |
| Date Submitted by the Author: | 09-May-2019                                                                                                                                                                                                                                                         |
| Complete List of Authors:     | Williams, A. Jess; University of Birmingham, School of Psychology<br>Arcelus, J; University of Nottingham , School of Medicine<br>Townsend, Ellen; University of Nottingham, School of Psychology<br>Michail, Maria; University of Birmingham, School of Psychology |
| Keywords:                     | Suicide & self-harm < PSYCHIATRY, sexual identity, gender identity, young people                                                                                                                                                                                    |
|                               |                                                                                                                                                                                                                                                                     |

SCHOLARONE™  
Manuscripts

1  
2  
3 **1 A systematic review examining risk factors for self-harm and suicide in LGBTQ+ young people**  
4

5 2  
6  
7 3 A. Jess Williams\*<sup>1,2</sup> (a.williams.10@pgr.bham.ac.uk), Jon Arcelus<sup>3</sup> (jon.arcelus@nottingham.ac.uk),  
8 4 Ellen Townsend<sup>2</sup> (ellen.townsend@nottingham.ac.uk), Maria Michail<sup>1</sup> (m.michail@bham.ac.uk)  
9

10  
11 5  
12  
13 6 <sup>1</sup>Institute for Mental Health, School of Psychology, University of Birmingham, UK  
14

15 7 <sup>2</sup>Self-Harm Research Group, School of Psychology, University of Nottingham, UK  
16

17 8 <sup>3</sup>Institute of Mental Health, School of Medicine, University of Nottingham, UK  
18

19 9  
20  
21 10  
22  
23 11  
24  
25 12 \* Corresponding author  
26

27 13 52 Pritchatt's Road,  
28

29 14 School of Psychology  
30

31 15 Institute for Mental Health  
32

33 16 University of Birmingham  
34

35 17 B15 2TT  
36

37 18 [a.williams.10@pgr.bham.ac.uk](mailto:a.williams.10@pgr.bham.ac.uk)  
38

39 19 Tel. +(44)121 4142855  
40  
41  
42  
43 20  
44  
45 21  
46

47 22 Word count: 2264 (excluding title page, abstract, references, figures and tables)  
48  
49 23  
50

51 24 Key words:  
52

53 25 Self-harm, suicide, sexual identity, gender identity, young people  
54  
55 26  
56  
57  
58  
59  
60

**27 ABSTRACT**

28 Introduction: Young people who identify as LGBTQ+ are at increased risk for self-harm, suicide  
29 ideation and behaviours. However, there has yet to be a comprehensive understanding of what risk  
30 factors influence these behaviours within LGBTQ+ young people as a whole. The purpose of this  
31 systematic review is to examine risk factors associated with self-harm, suicidal ideation and  
32 behaviour in LGBTQ+ young people.

33 Methods and analysis: A systematic review and meta-analysis will be conducted, conforming to the  
34 reporting guidelines of the Preferred Reporting Items for Systematic Reviews and Meta-Analyses  
35 (PRISMA) statement recommendations. Electronic databases (MEDLINE, Scopus, EMBASE , PsycINFO,  
36 and Web of Science) will be systematically searched for cross-sectional, prospective, longitudinal,  
37 cohort, and case-control designs which examine risk factors for self-harm and/or suicidal ideation  
38 and behaviour in LGBTQ+ young people. Only studies published in English will be included. No date  
39 restrictions will be applied. Study quality assessment will be conducted using a modified Newcastle-  
40 Ottawa Scale. A meta-analysis will be performed if appropriate; alternatively findings will be drawn  
41 together in a narrative synthesis.

42 Ethics and dissemination: This is a systematic review of published literature and thereby ethical  
43 approval was not sought. The review will be submitted to a peer-reviewed journal, be publicly  
44 disseminated at conferences focusing on mental health, self-harm and suicide prevention. The  
45 findings will also be shared through public engagement and involvement, particularly those related  
46 to young LGBTQ+ individuals.

47 PROSPERO registration number: CRD42019130037

48

**49 STRENGTHS AND LIMITATIONS OF THIS STUDY**

- 50 • This is the first systematic review of risk factors for self-harm, suicidal ideation and  
51 behaviour among LGBTQ+ young people.
- 52 • The protocol has been written following the PRISMA-P guidelines (2015).
- 53 • A limitation of this systematic review is the exclusion of studies which are not published in  
54 English; this may bias findings against non-English speaking countries.

55

## 56 INTRODUCTION

57 Suicide, intentionally ending one's own life[1], is one of the leading causes of death within young  
58 people[2-3]. Globally, suicide accounts for around 131,441 deaths between the ages of 15-24[2].  
59 Rates of self-harm, the self-injury or poisoning of one's self irrespective of suicidal intent[4], are on  
60 the rise among young people. Data from the 2014 Adult Morbidity Survey states that 25.7% of  
61 women and 9.7% of men were likely to have self-harmed between the ages of 16-24 years[5].  
62 Approximately 50% of those who die by suicide have previously self-harmed, making self-harm one  
63 of the strongest predictors of suicide[6-8].

64 Among people who identify under the umbrella term LGBTQ+ (Lesbian, Gay, Bisexual, Transgender,  
65 Queer or Questioning), this being how one self-identifies as their sex, sexuality, gender identity and  
66 gender expression[9], there are elevated rates of suicidal ideation (thoughts of self-harm, the  
67 consideration or planning of suicide[1]) and suicidal behaviour[10-12]. King et al's 2008 systematic  
68 review found that lesbian, gay and bisexual (LGB) individuals were found to be at higher risk for both  
69 suicidal behaviour and ideation compared to heterosexuals[10]. Internationally, this has been  
70 estimated to be between four to eight times higher in LGB and transgender (T) young people when  
71 compared to the heterosexual and cisgender peers[13]. While as a broad group, sexual and gender  
72 minorities have high levels of suicidal ideation and behaviour, among T people (individuals who do  
73 not present or identify with their sex assigned at birth[14]) these rates are even greater. Indeed,  
74 lifetime risk for suicide attempt is estimated to be between 22-43%, with 9-10% having made an  
75 attempt in the past 12 months[15-19].

76 Previous research has examined potential risk factors for self-harm and suicide in young people in  
77 general populations. These risk factors range from demographic characteristics such as being female,  
78 being younger or having fewer qualifications[20], to childhood abuse and neglect[21-22]. Additional  
79 risks such as bullying and academic pressure have been linked to suicidal behaviour in young  
80 people[23]. Other factors which relate to the risk of self-harm repetition include troubled  
81 relationships with family members, social isolation, poor academic performance, alcohol and drug  
82 misuse, and depression[24].

83 Given the heightened risk of suicide attempt within LGBTQ+[10-12, 25], it would be pertinent to  
84 explore which factors specifically pose as a risk to this population. Although some of these risk  
85 factors may overlap with those from non-LGBTQ+ populations (e.g. depression, substance or alcohol  
86 misuse)[10, 26], there are also unique risk factors to sexual and gender minorities. For example,  
87 Clements-Nolle et al[26] stated that experiences of abuse, discrimination or harassment due to an  
88 individual's gender identity or presentation were also linked to high levels of attempted suicide.  
89 Meyer[27-28] suggested that additional risk within homosexual communities may be related to the  
90 high levels of stigma, prejudice and discrimination which thereby impacts individual's mental  
91 wellbeing. Victimisation or discrimination due to sexual orientation and gender identity is  
92 particularly common within LGBTQ+ populations[29-32]. In addition, among LGBTQ+ young people  
93 these experiences were found to be significantly associated with suicidal ideation[33-34]. It is  
94 suggested that young people may internalise these experiences of public stigma in relation to being  
95 LGBTQ+, which can lead to adverse impacts on their self-perception and beliefs, which could then  
96 enhance suicidal ideation, behaviour or self-harm[35].

97

## 98 Why this review is important

99 The goal of this systematic review is to comprehensively examine risk factors for self-harm and  
100 suicide ideation and behaviour within LGBTQ+ young people. Identifying and understanding how  
101 these factors relate to self-harm and suicide could allow future research to address specific risks and  
102 streamline potential studies to target the mental health needs of this population. Previous reviews  
103 regarding various dimensions of self-harm[21-22, 36-38] have focused on a specific subgroup, such  
104 as the prevalence within transgender population[39]. Whereas, few have considered both self-harm  
105 and suicide in relation to LGBTQ+ populations as a broad group[10, 40-41]. Thus, this review not only  
106 takes a dimensional approach to include self-harmful thoughts and behaviour with and without  
107 intent of suicide, thereby covering a wide spectrum of suicide and self-harm, but also includes all  
108 sexual and gender minorities.

109 Objective: To examine risk factors associated with self-harm and suicide ideation and behaviour in  
110 LGBTQ+ young people.

111

## 112 METHODS

113 A systematic review of empirical quantitative studies which examine risk factors for self-harm and  
114 suicidal ideation and behaviour in LGBTQ+ young people will be conducted. The search will consider  
115 all studies up to the 1<sup>st</sup> of April 2019. This protocol follows the Preferred Reporting Items for  
116 Systematic Reviews and Meta-Analyses Protocol (PRISMA-P) guidelines[42], presented in the  
117 supplementary file 1. Study quality will be assessed by the Newcastle-Ottawa Scale (NOS)[43] and  
118 the adapted version for cross-sectional studies[44]. The protocol for this article has been registered  
119 with PROSPERO: CRD42019130037.

120 Eligibility criteria: see table 1 for summary:

121 *Types of studies:* This will include empirical quantitative peer reviewed studies following cross-  
122 sectional, prospective, longitudinal, cohort, and case-control designs which examine risk factors for  
123 self-harm and/or suicidal ideation and behaviour in LGBTQ+ young people. These papers may  
124 specifically focus on one subgroup of the LGBTQ+ umbrella (e.g. transgender) or look across groups  
125 (e.g. LGB). Mixed-method papers which have applicable extractable information will also be  
126 included. Grey literature such as theses, dissertations or conference proceedings will not be  
127 included. Commentary, reviews, editorial or opinion pieces will also be excluded. All included studies  
128 must be available as full-text and peer-reviewed in the English language.

129 *Types of participants:* Participants between the ages of 12-25 years old, who identify as LGBTQ+  
130 (Lesbian, Gay, Bisexual, Transgender, Queer or Questioning) referring to how one self-identifies as  
131 their sex, sexuality, gender identity and gender expression[9]. Participants will also have had  
132 experiences of self-harm (self-injury or poisoning irrespective of suicidal intention[4], suicide  
133 ideation (thoughts of self-harm, the consideration or planning of a suicidal attempt e.g. method[1]or  
134 suicidal behaviour (intentionally trying to end one's own life[1]. Alternatively, if participants met the  
135 above inclusion criteria as a subgroup, this data will be extracted.

1  
2  
3 136 *Types of outcome measures:* Studies will be included if they used a measure for self-harm, suicidal  
4 137 ideation or suicidal behaviour. Consideration of the number of events (self-harm and suicidal  
5 138 attempts, suicidal ideation will be taken as present or not present) as described by study authors,  
6 139 and any standardised rating scale for assessing the presence of self-harm and suicidal ideation and  
7 140 behaviour. This can be specific tools for considering suicide e.g. Beck Scale for Suicide Ideation  
8 141 (SSI)[45]; Motto's Risk Estimator for Suicide[46]; Positive and Negative Suicide Ideation (PANSI)[47];  
9 142 Columbia-Suicide Severity Rating Scale[48]; or self-harm e.g. Self-Harm Inventory (SHI)[49];  
10 143 Inventory of Statements about Self-injury (ISAS)[36]; Self-Injurious Thoughts and Behaviour  
11 144 Interview (SITBI) Short Form[50]. Also included will be self-harm or suicide items from general scales  
12 145 such as items 102-105 from the Mental Health History Form[51] or individual questions regarding  
13 146 self-harm or suicide had ever been considered or acted upon[52] and clinician reports.

147 *Table 1: Inclusion and exclusion criteria for papers*

| Inclusion Criteria                                                                                                                                                                                                                                                                                                                                                                                                                                                                                                                                                                                                                                                                               | Exclusion criteria                                                                                                                                                                                                                                                                                                                                                                                                                                                                                                                                                                                                                                                                                             |
|--------------------------------------------------------------------------------------------------------------------------------------------------------------------------------------------------------------------------------------------------------------------------------------------------------------------------------------------------------------------------------------------------------------------------------------------------------------------------------------------------------------------------------------------------------------------------------------------------------------------------------------------------------------------------------------------------|----------------------------------------------------------------------------------------------------------------------------------------------------------------------------------------------------------------------------------------------------------------------------------------------------------------------------------------------------------------------------------------------------------------------------------------------------------------------------------------------------------------------------------------------------------------------------------------------------------------------------------------------------------------------------------------------------------------|
| <ul style="list-style-type: none"> <li>- Peer reviewed studies.</li> <li>- Any geographical location.</li> <li>- English language.</li> <li>- Empirical quantitative studies, following cross-sectional, prospective, longitudinal, cohort and case-control designs.</li> <li>- Studies must consider factors associated with or predictive of self-harm, suicidal ideation or suicidal behaviour.</li> <li>- Participants must be young people (12-25 years).</li> <li>- Participants that are identified or self-identified as any sexual or gender minority or member of LGBTQ+.</li> <li>- Participants that have had an experience of self-harm, suicidal ideation or behaviour.</li> </ul> | <ul style="list-style-type: none"> <li>- Non-peer reviewed literature.</li> <li>- Not English language.</li> <li>- Grey literature such as theses, dissertation or conference proceedings.</li> <li>- Articles such as commentaries, reviews, editorial or opinion pieces.</li> <li>- Empirical qualitative studies.</li> <li>- Studies not considering risk factors.</li> <li>- Sample not aged between 12 and 25 years, e.g. adults 26 years and above or children 12 years and under.</li> <li>- Participants who are identified as heterosexual or not part of sexual or gender minority.</li> <li>- Participants who have no experience of self-harm, suicidal ideation or suicidal behaviour.</li> </ul> |

148

149 Search strategy:

150 The search will be limited to English language and run up to 31<sup>st</sup> March 2019. No date restrictions  
151 will be applied. The following electronic bibliographic databases were searched: MEDLINE, Scopus,  
152 EMBASE, PsycINFO, and Web of Science for peer-reviewed publications which examine risk factors  
153 for self-harm or suicide within LGBTQ+ young people. The search strategy can be found in the  
154 supplementary file 2. This was developed in collaboration with an academic skill specialist from the  
155 University of Birmingham library to ensure the robustness of the search. Reference lists of eligible  
156 papers and conduct citation searches of key papers will be explored to identify additional reports.  
157 Before the final draft of the systematic review is completed, a second search will be conducted to  
158 allow for any additional studies to be identified.

159 Study records:

1  
2  
3 160 *Selection process:* The search strategy will retrieve titles and/or abstracts which will be screened by  
4 161 two independent researchers to identify studies which potentially meet the inclusion criteria  
5 162 outlined above. The full-texts of the studies will be retrieved and independently assessed for  
6 163 eligibility. Any disagreement or uncertainty over the eligibility of particular studies will be resolved  
7 164 through discussion.

8  
9  
10 165 *Data management and collection:* Rayyan QCRI (<https://rayyan.qcri.org/welcome>), the online  
11 166 systematic review tool, will be used to manage and screen all retrieved papers. AJW will be the solo  
12 167 team member responsible for adding or amending paper records in Rayyan, as well as identifying  
13 168 and removing duplicates. A second independent reviewer will be given access to all titles and  
14 169 abstracts, within Rayyan. They will be able to make their own decision as to whether to include or  
15 170 exclude a paper, blind to AJW's decisions. AJW will also be blind to the decisions of the second  
16 171 reviewer until all titles and abstracts are reviewed. Rayyan will provide information on the original  
17 172 number of titles screened, duplications, those excluded at this stage, and those included titles at this  
18 173 stage.

19  
20  
21  
22  
23 174 Those papers which reach full-text screening will be managed within Zotero  
24 175 (<https://www.zotero.org/>), the bibliographic software. These will be sectioned by those included at  
25 176 full-text screening, and final inclusion. Reason for exclusion will be reported for each paper. AJW will  
26 177 be responsible for liaising with inter-library loans and obtaining the full-text papers. Full-text  
27 178 screening will again be conducted by two researchers, blind to each other's decisions, who will  
28 179 resolve disagreements through discussion. If an agreement cannot be reached regarding a paper,  
29 180 this will be rated by a third researcher.

30  
31  
32  
33 181 A pre-piloted standardised data extraction tool will be adapted and used on included studies[53].  
34 182 Extracted information will include: 1) author and publication date; 2) study design and setting; 3)  
35 183 characteristics of participants (age, gender identity), and the studies' inclusion and exclusion criteria;  
36 184 4) method of harm (self-harm, suicidal behaviour or ideation); 5) factors associated with or  
37 185 predictive of self-harm or suicidal ideation and behaviour (including clinician diagnosis, subscales or  
38 186 validated scales used to assess these items); 6) information relating to risk of bias for the individual  
39 187 study.

40  
41  
42 188 *Risk of bias (quality assessment):* The overall quality of each study will be evaluated by two  
43 189 independent researchers using the Newcastle-Ottawa Scale (NOS)[43] and the Newcastle-Ottawa  
44 190 Scale adapted for cross-sectional studies[44].

45  
46  
47 191 *Data synthesis and assessment of heterogeneity:* Descriptive results of each included study will be  
48 192 presented in a table format, such as details regarding study design, participants, self-harm or suicidal  
49 193 ideation and behaviour methods and measures, identified factors and tools used to assess these.

50  
51  
52 194 A meta-analysis of risk factors for self-harm and suicidal ideation and behaviour using RevMan 5  
53 195 (<https://community.cochrane.org/help/tools-and-software/revman-5/revman-5-download>) will be  
54 196 conducted by pooling data on risk factors using a random-effects model with the assumption that  
55 197 populations have various effect sizes and weights studies from in- and between-study variance. This  
56 198 will consider the extent or heterogeneity, which will be determined using the  $I^2$  statistic. From this, a  
57 199 summary effect will be presented, associated 95% CI and  $p$  values. Publication bias will be assessed  
58 200 using funnel plots and Harbord-Egger test[54].



201 Additionally, consideration will be given to subgroup analysis if data allows, exploring heterogeneity  
202 by sexual and gender minorities; such that these studies are split by LGBTQ and transgender; as even  
203 within this population it is recognised that the transgender population have high levels of suicide risk  
204 and self-harm[39, 55]. This will allow us to determine which risk factors are similar within sexual and  
205 gender minorities, and those that unique to the transgender population. Further examination of risk  
206 factors will be conducted by age difference, split by 12-18years and 19-25years.

207 The quality of the included studies will be considered when synthesising and analysing the findings in  
208 terms of the strength of evidence which they provide. A sensitivity analysis will be run to assess the  
209 robustness of the studies[56]. If statistical pooling is not possible, findings will follow a narrative  
210 synthesis as suggested by ERSC guidelines[57]. The analysis will take place over four steps; 1)  
211 developing a theory of which factors influence LGBTQ+ young people, 2) synthesising the findings, 3)  
212 exploring whether there are relationships within the data and what these might be, 4) assessing the  
213 robustness of the synthesis.

214 *Patient and Public Involvement:* No patients involved.

215

## 216 **ETHICS AND DISSEMINATION**

217 This is a systematic review of published literature and thereby ethical approval was not sought. It  
218 will be submitted to a peer-reviewed journal, be publicly disseminated at conferences focusing on  
219 mental health, self-harm and suicide prevention. Findings will also be shared through public  
220 engagement and involvement, particularly considering young LGBTQ+ individuals.

221

## 222 **DISCUSSION**

223 This systematic review will be the first to provide a rich, holistic account of the existing evidence of  
224 risk factors for self-harm and suicidality within a broad sample of LGBTQ+ young people. The  
225 synthesis of these findings will assess the prevalence of particular factors which impact this  
226 population, which may not be relevant to non-sexual or gender minority young people.  
227 Acknowledging the similarities and differences of risk factors between sexual orientation and gender  
228 identity groups could be used as a valuable stepping stone when considering LGBTQ+ research and  
229 promoting more applicable research aims.

230 The quality and strength of the evidence will be rigorously assessed, which could be used to inform  
231 future research targeting these particular risks. This could ultimately help to inform self-harm and  
232 suicidality prevention within LGBTQ+ young people. It is anticipated that the findings of this review  
233 will be of interest to the wider academic and clinical community, policymakers, young people who  
234 identify as a sexual or gender minority, those with experience of self-harm or suicide.

235

## 236 **AUTHORS CONTRIBUTIONS**

1  
2  
3 237 All authors conceptualised the study. AJW developed the search strategy and conducted the  
4 238 literature search. AJW and MM wrote the first draft of the manuscript. All authors reviewed, edited,  
5 239 and approved the final manuscript.  
6  
7

8 240

9  
10 241 **FUNDING STATEMENT**

11  
12 242 This work was supported by the Midlands Graduate School ESRC DTP Joint Studentship awarded to  
13 243 A. Jess Williams. The funding body were not involved in the development of this protocol.  
14

15 244

16  
17 245 **COMPETING INTERESTS**

18  
19  
20 246 None declared.  
21  
22  
23  
24  
25  
26  
27  
28  
29  
30  
31  
32  
33  
34  
35  
36  
37  
38  
39  
40  
41  
42  
43  
44  
45  
46  
47  
48  
49  
50  
51  
52  
53  
54  
55  
56  
57  
58  
59  
60

247 **REFERENCES**

1. American Psychiatric Association. Diagnostic and statistical manual of mental disorders (DSM-5®). American Psychiatric Pub; 2013 May 22.
2. World Health Organization. Suicide across the world. 2016. Available from: [https://www.who.int/mental\\_health/prevention/suicide/suicideprevent/en/](https://www.who.int/mental_health/prevention/suicide/suicideprevent/en/). Accessed 7 January 2019.
3. Office for National Statistics. Suicides in the United Kingdom, 2017 Registration – ONS. 2018. Available at: <https://www.ons.gov.uk/releases/suicidesintheuk2017registrations>. Accessed 27 Feb. 2019.
4. National Collaborating Centre for Mental Health. Self-harm: Longer Term Management (NICE Clinical Guideline 133). London: National Institute for Clinical Excellence 2011.
5. McManus S, Bebbington P, Jenkins R et al. Mental health and wellbeing in England: Adult Psychiatric Morbidity Survey 2014. Leeds: NHS Digital. 2016. Available at <http://digital.nhs.uk/catalogue/PUB21748>. [Accessed 27 Feb. 2019]
6. Sakinofsky I. Repetition of suicidal behaviour. In: Hawton K, and Van Heeringen K eds. The International Handbook of Suicide and Attempted Suicide. Chichester: John Wiley & Sons Ltd, 2000:385–404.
7. Hawton K, Bergen H, Cooper J, et al. Suicide following self-harm: findings from the Multicentre Study of self-harm in England, 2000–2012. *Journal of Affective Disorders*. 2015 April;(175):147-151.
8. Rodway C, Tham SG, Ibrahim S, et al. Suicide in children and young people in England: a consecutive case series. *The Lancet Psychiatry*. 2016 Aug 1;3(8):751-9.
9. Jourian TJ. Evolving nature of sexual orientation and gender identity. *New Directions for Student Services*. 2015 Dec;(152):11-23.
10. King M, Semlyen J, Tai SS, Killaspy H, Osborn D, Popelyuk D, Nazareth I. A systematic review of mental disorder, suicide, and deliberate self harm in lesbian, gay and bisexual people. *BMC psychiatry*. 2008 Dec;8(1):70.
11. Plöderl M, Wagenmakers EJ, Tremblay P, Ramsay R, Kralovec K, Fartacek C, Fartacek R. Suicide risk and sexual orientation: a critical review. *Archives of Sexual Behavior*. 2013 Jul 1;42(5):715-27.
12. Hottes TS, Bogaert L, Rhodes AE, et al. Lifetime prevalence of suicide attempts among sexual minority adults by study sampling strategies: a systematic review and meta-analysis. *American journal of public health*. 2016 May;106(5):e1-2.
13. Haas AP, Eliason M, Mays VM, Mathy RM, Cochran SD, D'Augelli AR, Silverman MM, Fisher PW, Hughes T, Rosario M, Russell ST. Suicide and suicide risk in lesbian, gay, bisexual, and transgender populations: Review and recommendations. *Journal of homosexuality*. 2010 Dec 30;58(1):10-51.
14. Richards C, Barker M. Sexuality and gender for mental health professionals: A practical guide. Sage; 2013 Oct 15.
15. Whittle S, Turner L, Combs R, et al. Transgender EuroStudy: Legal Survey and Focus on the Transgender Experience of Health Care. Brussels, Belgium: ILGA Europe; 2008. <http://tgeu.org/sites/default/files/eurostudy.pdf>. Accessed 26 March 2019
16. Bauer GR, Pyne J, Francino MC, et al. Suicidality among trans people in Ontario: implications for social work and social justice/La suicidabilité parmi les personnes trans en Ontario: implications en travail social et en justice sociale. *Serv Soc*. 2013;59:35–62.

## Systematic Review Protocol [Version 6, May 2019]

- 1  
2  
3 292 17. Motmans J, de Biolley I, Debunne S. Being Transgender in Belgium: Mapping the Social and  
4 293 Legal Situation of Transgender People. Brussels: Institute for the Equality of Women and  
5 294 Men; 2010. [http://igvmiefh.  
6 295 99783.pdf](http://igvmiefh.belgium.be/nl/binaries/34%20-%20Transgender_ENG_tcm336-99783.pdf). Accessed 26 March 2019
- 8 296 18. Grant JM, Mottet LA, Tanis J, et al. Injustice at Every Turn: A Report of the National  
9 297 Transgender Discrimination Survey. Washington, D.C.: National Center for Transgender  
10 298 Equality and National Gay and Lesbian Task Force; 2011.  
11 299 [http://www.thetaskforce.org/downloads/reports/reports/ntds\\_full.pdf](http://www.thetaskforce.org/downloads/reports/reports/ntds_full.pdf). Accessed 26 March  
12 300 2019.
- 15 301 19. McNeil J, Bailey L, Ellis S, et al. Mental Health Study 2012. Edinburgh: Equality Network;  
16 302 2012. [http://www.scottishtrans.org/  
17 303 Uploads/Resources/trans\\_mh\\_study.pdf](http://www.scottishtrans.org/Uploads/Resources/trans_mh_study.pdf). Accessed 26  
18 304 20. Nock MK, Borges G, Bromet EJ, et al. Cross-national prevalence and risk factors for suicidal  
19 305 ideation, plans and attempts. *The British Journal of Psychiatry*. 2008 Feb;192(2):98-105.
- 21 306 21. Gratz KL. Risk factors for and functions of deliberate self-harm: An empirical and conceptual  
22 307 review. *Clinical Psychology: Science and Practice*. 2003 Jun;10(2):192-205.
- 23 308 22. Fliege H, Lee JR, Grimm A, et al. Risk factors and correlates of deliberate self-harm behavior:  
24 309 A systematic review. *Journal of psychosomatic research*. 2009 Jun 1;66(6):477-93.
- 26 310 23. Rodway C, Tham SG, Ibrahim S, et al. Suicide in children and young people in England: a  
27 311 consecutive case series. *The Lancet Psychiatry*. 2016 Aug 1;3(8):751-9.
- 28 312 24. Hawton K, James A. Suicide and deliberate self harm in young people. *BMJ*.  
29 313 2005;330(7496):891-4.
- 31 314 25. Semlyen J, King M, Varney J, et al. Sexual orientation and symptoms of common mental  
32 315 disorder or low wellbeing: combined meta-analysis of 12 UK population health surveys. *BMC  
33 316 psychiatry*. 2016 Dec;16(1):67.
- 35 317 26. Clements-Nolle K, Marx R, Katz M. Attempted suicide among transgender persons: The  
36 318 influence of gender-based discrimination and victimization. *Journal of homosexuality*. 2006  
37 319 Oct 11;51(3):53-69.
- 39 320 27. Meyer IH. Minority stress and mental health in gay men. *Journal of health and social  
40 321 behavior*. 1995 Mar;1:38-56.
- 41 322 28. Meyer IH. Prejudice, social stress, and mental health in lesbian, gay, and bisexual  
42 323 populations: conceptual issues and research evidence. *Psychological bulletin*. 2003  
43 324 Sep;129(5):674.
- 45 325 29. Cochran SD, Mays VM. Lifetime prevalence of suicide symptoms and affective disorders  
46 326 among men reporting same-sex sexual partners: results from NHANES III. *American journal  
47 327 of public health*. 2000 Apr;90(4):573.
- 49 328 30. Bontempo DE, d'Augelli AR. Effects of at-school victimization and sexual orientation on  
50 329 lesbian, gay, or bisexual youths' health risk behavior. *Journal of Adolescent Health*. 2002  
51 330 May 1;30(5):364-74.
- 53 331 31. Grossman AH, D'augelli AR, Frank JA. Aspects of psychological resilience among transgender  
54 332 youth. *Journal of LGBT Youth*. 2011 Mar 29;8(2):103-15.
- 55 333 32. Brandelli Costa A, Pasley A, Machado WD, et al. The experience of sexual stigma and the  
56 334 increased risk of attempted suicide in young Brazilian people from low socioeconomic group.  
57 335 *Frontiers in psychology*. 2017 Feb 22;8:192.

- 1  
2  
3 336 33. Kelleher C. Minority stress and health: Implications for lesbian, gay, bisexual, transgender,  
4 337 and questioning (LGBTQ) young people. *Counselling psychology quarterly*. 2009 Dec  
5 338 1;22(4):373-9.  
6  
7 339 34. Taliaferro LA, Muehlenkamp JJ. Nonsuicidal self-injury and suicidality among sexual minority  
8 340 youth: risk factors and protective connectedness factors. *Academic pediatrics*. 2017 Sep  
9 341 1;17(7):715-22.  
10  
11 342 35. McDermott E, Hughes E, Rawlings V. The social determinants of lesbian, gay, bisexual and  
12 343 transgender youth suicidality in England: a mixed methods study. *Journal of Public Health*.  
13 344 2017 Oct 17;40(3):e244-51.  
14  
15 345 36. Klonsky ED. The functions of deliberate self-injury: A review of the evidence. *Clinical*  
16 346 *psychology review*. 2007 Mar 1;27(2):226-39.  
17  
18 347 37. Skegg K. Self-harm. *The Lancet*. 2005 Oct 22;366(9495):1471-83.  
19  
20 348 38. Edmondson AJ, Brennan CA, House AO. Non-suicidal reasons for self-harm: a systematic  
21 349 review of self-reported accounts. *Journal of Affective Disorders*. 2016 Feb 1;191:109-17.  
22  
23 350 39. Marshall E, Claes L, Bouman WP, et al. Non-suicidal self-injury and suicidality in trans people:  
24 351 a systematic review of the literature. *International review of psychiatry*. 2016 Jan 2;28(1):58-  
25 352 69.  
26  
27 353 40. Marshal MP, Dietz LJ, Friedman MS, et al. Suicidality and depression disparities between  
28 354 sexual minority and heterosexual youth: A meta-analytic review. *Journal of adolescent*  
29 355 *health*. 2011 Aug 1;49(2):115-23.  
30  
31 356 41. E Mann G, Taylor A, Wren B, et al. Review of the literature on self-injurious thoughts and  
32 357 behaviours in gender-diverse children and young people in the United Kingdom. *Clinical child*  
33 358 *psychology and psychiatry*. 2018:1359104518812724.  
34  
35 359 42. Shamseer L, Moher D, Clarke M, et al. Preferred reporting items for systematic review and  
36 360 meta-analysis protocols (PRISMA-P) 2015: elaboration and explanation. *Bmj*. 2015 Jan  
37 361 2;349:g7647.  
38  
39 362 43. Wells G, Shea B, O'Connell D, et al. Newcastle-Ottawa quality assessment scale cohort  
40 363 studies. 2011. [http://www.ohri.ca/programs/clinical\\_epidemiology/oxford.asp](http://www.ohri.ca/programs/clinical_epidemiology/oxford.asp).  
41  
42 364 44. Herzog R, Álvarez-Pasquin MJ, Díaz C, et al. Are healthcare workers' intentions to vaccinate  
43 365 related to their knowledge, beliefs and attitudes? A systematic review. *BMC public health*.  
44 366 2013 Dec;13(1):154.  
45  
46 367 45. Beck AT, Steer RA, Ranieri WF. Scale for suicide ideation: psychometric properties of a  
47 368 self-report version. *Journal of clinical psychology*. 1988 Jul;44(4):499-505.  
48  
49 369 46. Bostrom AG, Cronbach J. Development of a clinical instrument to estimate suicide risk. *Am J*  
50 370 *Psychiatry*. 1985 Jun 6;142(6):680-6.  
51  
52 371 47. Muehlenkamp JJ, Gutierrez PM, Osman A, et al. Validation of the Positive and Negative  
53 372 Suicide Ideation (PANSI) Inventory in a diverse sample of young adults. *Journal of Clinical*  
54 373 *Psychology*. 2005 Apr;61(4):431-45.  
55  
56 374 48. Posner K, Brown GK, Stanley B, et al. The Columbia–Suicide Severity Rating Scale: initial  
57 375 validity and internal consistency findings from three multisite studies with adolescents and  
58 376 adults. *American Journal of Psychiatry*. 2011 Dec;168(12):1266-77.  
59  
60 377 49. Sansone RA, Wiederman MW, Sansone LA. The self-harm inventory (SHI): Development of a  
378 scale for identifying self-destructive behaviors and borderline personality disorder. *Journal*  
379 *of clinical psychology*. 1998 Nov;54(7):973-83.

## Systematic Review Protocol [Version 6, May 2019]

- 1  
2  
3 380 50. Nock MK, Holmberg EB, Photos VI, Michel BD. Self-Injurious Thoughts and Behaviors  
4 381 Interview: Development, reliability, and validity in an adolescent sample.  
5 382  
6 382 51. Boudewyn AC, Liem JH. Mental health history form. 1995. *Unpublished measure, University*  
7 383 *of Massachusetts Boston.*  
8 384 52. Taylor PJ, Dhingra K, Dickson JM, et al. Psychological correlates of self-harm within gay,  
9 385 lesbian and bisexual UK University students. *Archives of suicide research.* 2018 Sep 28:1-6.  
10 386 53. Knipe D, Williams AJ, Hannan-Swain S, et al. Psychiatric morbidity and suicidal behaviour in  
11 387 low and middle-income countries: A systematic review and meta-analysis. (*in press*)  
12 388 54. Harbord RM, Egger M, Sterne JA. A modified test for small-study effects in meta-analyses of  
13 389 controlled trials with binary endpoints. *Statistics in medicine.* 2006 Oct 30;25(20):3443-57.  
14 390 55. Arcelus J, Claes L, Witcomb GL, et al. Risk factors for non-suicidal self-injury among trans  
15 391 youth. *The Journal of Sexual Medicine.* 2016 Mar 1;13(3):402-12.  
16 392 56. Deeks JJ, Higgins JP, Altman DG. Analysing data and undertaking meta-analyses. *Cochrane*  
17 393 *handbook for systematic reviews of interventions: Cochrane book series.* 2008 Sep 26:243-  
18 394 96.  
19 395 57. Popay J, Roberts H, Sowden A, et al. Guidance on the conduct of narrative synthesis in  
20 396 systematic reviews. A product from the ESRC methods programme Version. 2006 Apr  
21 397 1;1:b92.

## PRISMA-P 2015 Checklist

This checklist has been adapted for use with protocol submissions to *Systematic Reviews* from Table 3 in Moher D et al: Preferred reporting items for systematic review and meta-analysis protocols (PRISMA-P) 2015 statement. *Systematic Reviews* 2015 4:1

| Section/topic                     | #  | Checklist item                                                                                                                                                                                  | Information reported                |                                     | Line number(s) |
|-----------------------------------|----|-------------------------------------------------------------------------------------------------------------------------------------------------------------------------------------------------|-------------------------------------|-------------------------------------|----------------|
|                                   |    |                                                                                                                                                                                                 | Yes                                 | No                                  |                |
| <b>ADMINISTRATIVE INFORMATION</b> |    |                                                                                                                                                                                                 |                                     |                                     |                |
| <b>Title</b>                      |    |                                                                                                                                                                                                 |                                     |                                     |                |
| Identification                    | 1a | Identify the report as a protocol of a systematic review                                                                                                                                        | <input checked="" type="checkbox"/> | <input type="checkbox"/>            | 1              |
| Update                            | 1b | If the protocol is for an update of a previous systematic review, identify as such                                                                                                              | <input type="checkbox"/>            | <input checked="" type="checkbox"/> |                |
| <b>Registration</b>               | 2  | If registered, provide the name of the registry (e.g., PROSPERO) and registration number in the Abstract                                                                                        | <input checked="" type="checkbox"/> | <input type="checkbox"/>            | 47             |
| <b>Authors</b>                    |    |                                                                                                                                                                                                 |                                     |                                     |                |
| Contact                           | 3a | Provide name, institutional affiliation, and e-mail address of all protocol authors; provide physical mailing address of corresponding author                                                   | <input checked="" type="checkbox"/> | <input type="checkbox"/>            | 3-19           |
| Contributions                     | 3b | Describe contributions of protocol authors and identify the guarantor of the review                                                                                                             | <input checked="" type="checkbox"/> | <input type="checkbox"/>            | 237-239        |
| <b>Amendments</b>                 | 4  | If the protocol represents an amendment of a previously completed or published protocol, identify as such and list changes; otherwise, state plan for documenting important protocol amendments | <input type="checkbox"/>            | <input checked="" type="checkbox"/> |                |
| <b>Support</b>                    |    |                                                                                                                                                                                                 |                                     |                                     |                |
| Sources                           | 5a | Indicate sources of financial or other support for the review                                                                                                                                   | <input checked="" type="checkbox"/> | <input type="checkbox"/>            | 242-243        |
| Sponsor                           | 5b | Provide name for the review funder and/or sponsor                                                                                                                                               | <input checked="" type="checkbox"/> | <input type="checkbox"/>            | 242            |
| Role of sponsor/funder            | 5c | Describe roles of funder(s), sponsor(s), and/or institution(s), if any, in developing the protocol                                                                                              | <input checked="" type="checkbox"/> | <input type="checkbox"/>            | 242-243        |
| <b>INTRODUCTION</b>               |    |                                                                                                                                                                                                 |                                     |                                     |                |
| <b>Rationale</b>                  | 6  | Describe the rationale for the review in the context of what is already known                                                                                                                   | <input checked="" type="checkbox"/> | <input type="checkbox"/>            | 56-108         |
| <b>Objectives</b>                 | 7  | Provide an explicit statement of the question(s) the review will address with reference to participants, interventions, comparators, and outcomes (PICO)                                        | <input checked="" type="checkbox"/> | <input type="checkbox"/>            | 109-110        |

| Section/topic                      | #   | Checklist item                                                                                                                                                                                                                              | Information reported |                          | Line number(s)   |
|------------------------------------|-----|---------------------------------------------------------------------------------------------------------------------------------------------------------------------------------------------------------------------------------------------|----------------------|--------------------------|------------------|
|                                    |     |                                                                                                                                                                                                                                             | Yes                  | No                       |                  |
| <b>METHODS</b>                     |     |                                                                                                                                                                                                                                             |                      |                          |                  |
| Eligibility criteria               | 8   | Specify the study characteristics (e.g., PICO, study design, setting, time frame) and report characteristics (e.g., years considered, language, publication status) to be used as criteria for eligibility for the review                   | √                    | <input type="checkbox"/> | 120-148          |
| Information sources                | 9   | Describe all intended information sources (e.g., electronic databases, contact with study authors, trial registers, or other grey literature sources) with planned dates of coverage                                                        | √                    | <input type="checkbox"/> | 151-153; 176-177 |
| Search strategy                    | 10  | Present draft of search strategy to be used for at least one electronic database, including planned limits, such that it could be repeated                                                                                                  | √                    | <input type="checkbox"/> | Sup file 2       |
| <b>STUDY RECORDS</b>               |     |                                                                                                                                                                                                                                             |                      |                          |                  |
| Data management                    | 11a | Describe the mechanism(s) that will be used to manage records and data throughout the review                                                                                                                                                | √                    | <input type="checkbox"/> | 165-187          |
| Selection process                  | 11b | State the process that will be used for selecting studies (e.g., two independent reviewers) through each phase of the review (i.e., screening, eligibility, and inclusion in meta-analysis)                                                 | √                    | <input type="checkbox"/> | 160-164          |
| Data collection process            | 11c | Describe planned method of extracting data from reports (e.g., piloting forms, done independently, in duplicate), any processes for obtaining and confirming data from investigators                                                        | √                    | <input type="checkbox"/> | 153-154; 165-187 |
| Data items                         | 12  | List and define all variables for which data will be sought (e.g., PICO items, funding sources), any pre-planned data assumptions and simplifications                                                                                       | √                    | <input type="checkbox"/> | 181-187          |
| Outcomes and prioritization        | 13  | List and define all outcomes for which data will be sought, including prioritization of main and additional outcomes, with rationale                                                                                                        | √                    | <input type="checkbox"/> | 136-146          |
| Risk of bias in individual studies | 14  | Describe anticipated methods for assessing risk of bias of individual studies, including whether this will be done at the outcome or study level, or both; state how this information will be used in data synthesis                        | √                    | <input type="checkbox"/> | 188-190          |
| <b>DATA</b>                        |     |                                                                                                                                                                                                                                             |                      |                          |                  |
| Synthesis                          | 15a | Describe criteria under which study data will be quantitatively synthesized                                                                                                                                                                 | √                    | <input type="checkbox"/> | 191-212          |
|                                    | 15b | If data are appropriate for quantitative synthesis, describe planned summary measures, methods of handling data, and methods of combining data from studies, including any planned exploration of consistency (e.g., $I^2$ , Kendall's tau) | √                    | <input type="checkbox"/> | 194-200          |
|                                    | 15c | Describe any proposed additional analyses (e.g., sensitivity or subgroup analyses, meta-regression)                                                                                                                                         | √                    | <input type="checkbox"/> | 201-206          |
|                                    | 15d | If quantitative synthesis is not appropriate, describe the type of summary planned                                                                                                                                                          | √                    | <input type="checkbox"/> | 209-213          |
| Meta-bias(es)                      | 16  | Specify any planned assessment of meta-bias(es) (e.g., publication bias across studies, selective                                                                                                                                           | √                    | <input type="checkbox"/> | 199-200          |



1  
2  
3  
4  
5  
6  
7  
8  
9  
10  
11  
12  
13  
14  
15  
16  
17  
18  
19  
20  
21  
22  
23  
24  
25  
26  
27  
28  
29  
30  
31  
32  
33  
34  
35  
36  
37  
38  
39  
40  
41  
42  
43  
44  
45  
46

| Section/topic                            | #  | Checklist item                                                                   | Information reported |                          | Line number(s) |
|------------------------------------------|----|----------------------------------------------------------------------------------|----------------------|--------------------------|----------------|
|                                          |    |                                                                                  | Yes                  | No                       |                |
|                                          |    | reporting within studies)                                                        |                      |                          |                |
| <b>Confidence in cumulative evidence</b> | 17 | Describe how the strength of the body of evidence will be assessed (e.g., GRADE) | ✓                    | <input type="checkbox"/> | 188-190        |

For peer review only

**SUPPLEMENTARY FILE 2****Search strategy terms:**

(self-harm OR self harm\* OR self-injur\* OR "self injur\*" OR self-cut\* OR self-destruct\* OR "self destruct\*" OR "nonsuicidal self-injur\*" OR "non-suicidal self injur\*" OR "deliberate self harm" OR "deliberate self-harm" OR DSH OR "self-mutil\*" OR overdos\* OR self-inflicted injur\* OR "self inflicted injur\*" OR suicid\* OR "parasuicid\*" OR para-suicid\* OR parasuicid\* OR suicidal behav\* OR suicide\* OR "life-threatening behavio\*" OR "suicide ideat\*" OR "suicide attempt\*" OR "attempted suicide\*" OR NSSI)

AND

(moderat\* OR mediat\* OR "risk facto\*" OR mechan\* OR predict\* OR pathway OR interact\* OR "protective facto\*" OR facto\* OR influence OR correlate\* OR precurs\* OR "causal facto\*")

AND

(transgender\* OR transsexual\* OR "gender nonconforming" OR "gender identity disorder" OR "gender dysphoria" OR "gender minority" OR lesbian\* OR gay\* OR bisexual\* OR "sexual minority" OR "same-sex" OR homosexual\* OR "homosexuality, male" OR "homosexuality, female" OR "gender identity" OR non-heterosexual\* OR "non heterosexual\*" OR homosexuality OR queer\* OR questioning OR "non-binary" OR "non binary" OR "LGBT\*" OR "sexual dissident\*" OR "sexual and gender minorities" OR "gender variant" OR gender-variant OR genderqueer OR intersex OR "minority groups" OR "TGNC" OR "transgender and gender nonconforming")

AND

(Child\* OR adolesc\* OR "young people" OR kid\* OR pupils OR youth OR juvenile OR "young adult\*" OR "young person" OR minor\*)

1  
2  
3 **Example of highly sensitive search strategy used in EMBASE**  
4

5  
6  
7  
8  
9  
10  
11  
12  
13  
14  
15  
16  
17  
18  
19  
20  
21  
22  
23  
24  
25  
26  
27  
28  
29  
30  
31  
32  
33  
34  
35  
36  
37  
38  
39  
40  
41  
42  
43  
44  
45  
46  
47  
48  
49  
50  
51  
52  
53  
54  
55  
56  
57  
58  
59  
60

|                                                                                       |                                                                                                                                                                                                                                                                                                                                                                                                                                                                                                                                                                                                                                                                                                           |
|---------------------------------------------------------------------------------------|-----------------------------------------------------------------------------------------------------------------------------------------------------------------------------------------------------------------------------------------------------------------------------------------------------------------------------------------------------------------------------------------------------------------------------------------------------------------------------------------------------------------------------------------------------------------------------------------------------------------------------------------------------------------------------------------------------------|
| <p><i>Search terms (AND, OR, NOT) and truncation (wildcard characters like *)</i></p> | <ol style="list-style-type: none"> <li>1. exp automutilation/</li> <li>2. exp suicide/</li> <li>3. exp suicide attempt/</li> <li>4. exp suicidal ideation/</li> <li>5. 1 or 2 or 3 or 4</li> <li>6. exp risk factor/</li> <li>7. exp "sexual and gender minority"/</li> <li>8. exp homosexuality/</li> <li>9. exp bisexuality/</li> <li>10. exp transgender/</li> <li>11. exp LGBT people/</li> <li>12. exp gender identity/</li> <li>13. 7 or 8 or 9 or 10 or 11 or 12</li> <li>14. exp adolescent/</li> <li>15. exp child/</li> <li>16. young people.mp.</li> <li>17. exp young adult/</li> <li>18. exp juvenile/</li> <li>19. 14 or 15 or 16 or 17 or 18</li> <li>20. 5 and 6 and 13 and 19</li> </ol> |
|---------------------------------------------------------------------------------------|-----------------------------------------------------------------------------------------------------------------------------------------------------------------------------------------------------------------------------------------------------------------------------------------------------------------------------------------------------------------------------------------------------------------------------------------------------------------------------------------------------------------------------------------------------------------------------------------------------------------------------------------------------------------------------------------------------------|

# BMJ Open

## A systematic review protocol examining risk factors for self-harm and suicide in LGBTQ+ young people

|                                 |                                                                                                                                                                                                                                                                     |
|---------------------------------|---------------------------------------------------------------------------------------------------------------------------------------------------------------------------------------------------------------------------------------------------------------------|
| Journal:                        | <i>BMJ Open</i>                                                                                                                                                                                                                                                     |
| Manuscript ID                   | bmjopen-2019-031541.R1                                                                                                                                                                                                                                              |
| Article Type:                   | Protocol                                                                                                                                                                                                                                                            |
| Date Submitted by the Author:   | 06-Aug-2019                                                                                                                                                                                                                                                         |
| Complete List of Authors:       | Williams, A. Jess; University of Birmingham, School of Psychology<br>Arcelus, J; University of Nottingham , School of Medicine<br>Townsend, Ellen; University of Nottingham, School of Psychology<br>Michail, Maria; University of Birmingham, School of Psychology |
| <b>Primary Subject Heading</b>: | Mental health                                                                                                                                                                                                                                                       |
| Secondary Subject Heading:      | Public health, Research methods                                                                                                                                                                                                                                     |
| Keywords:                       | Suicide & self-harm < PSYCHIATRY, gender identity, young people, sexual orientation                                                                                                                                                                                 |
|                                 |                                                                                                                                                                                                                                                                     |

SCHOLARONE™  
Manuscripts

1  
2  
3 **1 A systematic review protocol examining risk factors for self-harm and suicide in LGBTQ+ young**  
4 **2 people**  
5  
6  
7 3

8  
9 4 A. Jess Williams\*<sup>1,2</sup> (a.williams.10@pgr.bham.ac.uk), Jon Arcelus<sup>3</sup> (jon.arcelus@nottingham.ac.uk),  
10 5 Ellen Townsend<sup>2</sup> (ellen.townsend@nottingham.ac.uk), Maria Michail<sup>1</sup> (m.michail@bham.ac.uk)  
11  
12 6

13  
14 7 <sup>1</sup>Institute for Mental Health, School of Psychology, University of Birmingham, UK  
15

16 8 <sup>2</sup>Self-Harm Research Group, School of Psychology, University of Nottingham, UK  
17

18 9 <sup>3</sup>Institute of Mental Health, School of Medicine, University of Nottingham, UK  
19  
20  
21 10  
22  
23 11  
24  
25 12

26  
27 13 \* Corresponding author  
28

29 14 52 Pritchatts Road,  
30

31 15 School of Psychology  
32

33 16 Institute for Mental Health  
34

35 17 University of Birmingham  
36

37 18 B15 2TT  
38

39 19 [a.williams.10@pgr.bham.ac.uk](mailto:a.williams.10@pgr.bham.ac.uk)  
40  
41  
42 20 Tel. +(44)121 4142855  
43  
44 21  
45  
46 22  
47

48 23 Word count: 2396 (excluding title page, abstract, references, figures and tables)  
49  
50 24  
51

52 25 Key words:  
53

54 26 Self-harm, suicide, sexual orientation, gender identity, young people  
55  
56  
57 27  
58  
59  
60

**28 ABSTRACT**

29 Introduction: Young people who identify as LGBTQ+ are at increased risk for self-harm, suicide  
30 ideation and behaviours. However, there has yet to be a comprehensive understanding of what risk  
31 factors influence these behaviours within LGBTQ+ young people as a whole. The purpose of this  
32 systematic review is to examine risk factors associated with self-harm, suicidal ideation and  
33 behaviour in Lesbian, Gay, Bisexual, Transgender, Queer or Questioning (LGBTQ+) young people.

34 Methods and analysis: A systematic review will be conducted, conforming to the reporting  
35 guidelines of the Preferred Reporting Items for Systematic Reviews and Meta-Analyses (PRISMA)  
36 statement recommendations. Electronic databases (MEDLINE, Scopus, EMBASE, PsycINFO, and Web  
37 of Science) will be systematically searched for cross-sectional, prospective, longitudinal, cohort, and  
38 case-control designs which examine risk factors for self-harm and/or suicidal ideation and behaviour  
39 in LGBTQ+ young people (aged 12-25 years). Only studies published in English will be included. No  
40 date restrictions will be applied. Study quality assessment will be conducted using the original and  
41 modified Newcastle-Ottawa Scales. Meta-analysis or narrative synthesis will be utilised, dependent  
42 on findings.

43 Ethics and dissemination: This is a systematic review of published literature and thereby ethical  
44 approval was not sought. The review will be submitted to a peer-reviewed journal, be publicly  
45 disseminated at conferences focusing on mental health, self-harm and suicide prevention. The  
46 findings will also be shared through public engagement and involvement, particularly those related  
47 to young LGBTQ+ individuals.

48 PROSPERO registration number: CRD42019130037

**50 STRENGTHS AND LIMITATIONS OF THIS STUDY**

- 51 • This is the first systematic review of risk factors for both self-harm as an individual  
52 behaviour, and suicidal ideation and suicidal behaviour among LGBTQ+ young people.
- 53 • The protocol has been written following the PRISMA-P guidelines (2015).
- 54 • The robust search strategy was conducted with input from an academic skills specialist to  
55 ensure replication across all databases, and capture a large range of papers.
- 56 • The systematic review will follow the Cochrane Review guidelines.
- 57 • A limitation of this systematic review is the exclusion of studies which are not published in  
58 English; this may bias findings against non-English speaking countries.

## 60 INTRODUCTION

61 Suicide, intentionally ending one's own life[1], is one of the leading causes of death within young  
62 people[2-3]. Globally, suicide accounts for around 131,441 deaths between the ages of 15-24[2].  
63 Rates of self-harm, the self-injury or poisoning of one's self irrespective of suicidal intent[4], are on  
64 the rise among young people [5]. Data from the 2014 UK Adult Morbidity Survey states that 25.7% of  
65 women and 9.7% of men were likely to have self-harmed between the ages of 16-24 years[6].  
66 Approximately 50% of those who die by suicide have previously self-harmed, making self-harm one  
67 of the strongest predictors of suicide[7-9].

68 Among people who identify under the umbrella term LGBTQ+ (Lesbian, Gay, Bisexual, Transgender,  
69 Queer or Questioning), this being how one self-identifies as their sex, sexuality, gender identity and  
70 gender expression[10], there are elevated rates of suicidal ideation (thoughts of self-harm, the  
71 consideration or planning of suicide[1]) and suicidal behaviour[11-13]. King et al's 2008 systematic  
72 review found that lesbian, gay and bisexual (LGB) individuals were found to be at higher risk for both  
73 suicidal behaviour and ideation compared to heterosexuals[11]. Internationally, this has been  
74 estimated to be between four to eight times higher in LGB and transgender (T) young people when  
75 compared to the heterosexual and cisgender peers[14]. While as a broad group, sexual and gender  
76 minorities have high levels of suicidal ideation and behaviour, among transgender people  
77 (individuals who do not present or identify with their sex assigned at birth[15]) these rates are even  
78 greater. Indeed, lifetime risk for suicide attempt is estimated to be between 22-43%, with 9-10%  
79 having made an attempt in the past 12 months[16-20].

80 Previous research has examined potential risk factors for self-harm and suicide in young people in  
81 general populations. These risk factors range from demographic characteristics such as being female,  
82 being a younger adult or adolescent, having fewer qualifications[21], to childhood abuse and  
83 neglect[22-23]. Additional risks such as bullying and academic pressure have been linked to suicidal  
84 behaviour in young people[24], as well as any mental health disorder[25]. Other factors which relate  
85 to the risk of self-harm repetition include troubled relationships with family members, social  
86 isolation, poor academic performance, alcohol and drug misuse, and depression[26].

87 Given the heightened risk of suicide attempt within LGBTQ+[11-13, 27], it would be pertinent to  
88 explore which factors specifically pose as a risk to this population. Although some of these risk  
89 factors may overlap with those from non-LGBTQ+ populations (e.g. depression, substance or alcohol  
90 misuse)[11, 28], there are also unique risk factors to sexual and gender minorities. For example,  
91 Clements-Nolle et al[28] stated that experiences of abuse, discrimination or harassment due to an  
92 individual's gender identity or presentation were also linked to high levels of attempted suicide.  
93 Meyer[29-30] suggested that additional risk within homosexual communities may be related to the  
94 high levels of stigma, prejudice and discrimination which thereby impacts individual's mental  
95 wellbeing. Victimisation or discrimination due to sexual orientation and gender identity is  
96 particularly common within LGBTQ+ populations[31-34]. In addition, among LGBTQ+ young people  
97 these experiences were found to be significantly associated with suicidal ideation[35-36]. It is  
98 suggested that young people may internalise these experiences of public stigma in relation to being  
99 LGBTQ+, known as internalised homophobia [37], which can lead to adverse impacts on their self-  
100 perception and beliefs, which could then enhance suicidal ideation, behaviour or self-harm[38].

101

## 102 Why this review is important

103 The goal of this systematic review is to comprehensively examine risk factors for self-harm and  
104 suicide ideation and behaviour within LGBTQ+ young people. Identifying and understanding how  
105 these factors relate to self-harm and suicide could allow future research to address specific risks and  
106 streamline potential studies to target the mental health needs of this population. Previous reviews  
107 regarding various dimensions of self-harm[22-23, 39-41] have focused on a specific subgroup, such  
108 as the prevalence within transgender population[42] or sexual orientation[43]. Whereas, few have  
109 considered both self-harm and suicide in relation to LGBTQ+ populations as a broad group[11, 43-  
110 45]. Thus, this review not only takes a dimensional approach to include self-harmful thoughts and  
111 behaviour with and without intent of suicide, thereby covering a wide spectrum of suicide and self-  
112 harm, but also includes all sexual and gender minorities.

113 Objectives:

- 114 1) To examine risk factors associated with self-harm and suicide ideation and behaviour in  
115 LGBTQ+ young people.
- 116 2) To examine whether there is a difference between sexual orientation minority young people  
117 and gender identity minority young people in the type of risk factors for self-harm, suicidal  
118 ideation and behaviour.

## 120 METHODS

121 A systematic review of empirical quantitative studies which examine risk factors for self-harm and  
122 suicidal ideation and behaviour in LGBTQ+ young people will be conducted. The search considered  
123 all studies up to the 1<sup>st</sup> of April 2019, a summary of eligibility criteria is shown in table 1. This  
124 protocol follows the Preferred Reporting Items for Systematic Reviews and Meta-Analyses Protocol  
125 (PRISMA-P) guidelines[46], presented in the supplementary file 1. Study quality will be assessed by  
126 the Newcastle-Ottawa Scale (NOS)[47] and the adapted version for cross-sectional studies[48]. The  
127 protocol for this article has been registered with PROSPERO: CRD42019130037.

128 Eligibility criteria: see table 1 for summary:

129 *Types of studies:* These include empirical quantitative peer reviewed studies following cross-  
130 sectional, prospective, longitudinal, cohort, and case-control designs which examine risk factors for  
131 self-harm and/or suicidal ideation and behaviour in LGBTQ+ young people. Risk factors being  
132 identified as significant predictors, mediators or moderators which influence a self-harm or suicidal  
133 outcome. These papers may specifically focus on one subgroup of the LGBTQ+ umbrella (e.g.  
134 transgender) or look across groups (e.g. LGB). Mixed-method papers which have applicable  
135 extractable information will also be included. Grey literature such as theses, dissertations or  
136 conference proceedings will not be included. Commentary, reviews, editorial or opinion pieces will  
137 also be excluded. All included studies must be available as full-text and peer-reviewed in the English  
138 language.

139 *Types of participants:* Participants between the ages of 12-25 years old, who identify as LGBTQ+  
140 (Lesbian, Gay, Bisexual, Transgender, Queer or Questioning) referring to how one self-identifies as  
141 their sex, sexuality, gender identity and gender expression[10]. Participants will also have had



142 experiences of self-harm (self-injury or poisoning irrespective of suicidal intention[4]), suicide  
 143 ideation (this can include thoughts of self-harm, the consideration or planning of a suicidal attempt  
 144 e.g. method[1]) or suicidal behaviour (intentionally trying to end one's own life[1]). Alternatively, if  
 145 participants met the above inclusion criteria as a subgroup, this data will be extracted.

146 *Types of outcome measures:* Studies will be included if they used a measure for self-harm, suicidal  
 147 ideation or suicidal behaviour. A binary variable of self-harm, suicidal ideation and suicidal attempt  
 148 will be taken as described by study authors, and any standardised rating scale for assessing the  
 149 presence of self-harm and suicidal ideation and behaviour. This can be specific tools for considering  
 150 suicide e.g. Beck Scale for Suicide Ideation (SSI)[49]; Motto's Risk Estimator for Suicide[50]; Positive  
 151 and Negative Suicide Ideation (PANSI)[51]; Columbia-Suicide Severity Rating Scale[52]; or self-harm  
 152 e.g. Self-Harm Inventory (SHI)[53]; Inventory of Statements about Self-injury (ISAS)[38]; Self-  
 153 Injurious Thoughts and Behaviour Interview (SITBI) Short Form[54]. Also included will be self-harm  
 154 or suicide items from general scales such as items 102-105 from the Mental Health History Form[55]  
 155 or individual questions regarding self-harm or suicide had ever been considered or acted upon[56]  
 156 and clinician reports.

157 *Table 1: Inclusion and exclusion criteria for papers*

| Inclusion Criteria                                                                                                       | Exclusion criteria                                                                                        |
|--------------------------------------------------------------------------------------------------------------------------|-----------------------------------------------------------------------------------------------------------|
| - Peer reviewed studies.                                                                                                 | - Non-peer reviewed literature.                                                                           |
| - Any geographical location.                                                                                             | - Not English language.                                                                                   |
| - English language.                                                                                                      | - Grey literature such as theses, dissertation or conference proceedings.                                 |
| - Empirical quantitative studies, following cross-sectional, prospective, longitudinal, cohort and case-control designs. | - Articles such as commentaries, reviews, editorial or opinion pieces.                                    |
| - Studies must consider factors associated with or predictive of self-harm, suicidal ideation or suicidal behaviour.     | - Empirical qualitative studies.                                                                          |
| - Participants must be young people (12-25 years).                                                                       | - Studies not considering risk factors.                                                                   |
| - Participants that are identified or self-identified as any sexual or gender minority or member of LGBTQ+.              | - Sample not aged between 12 and 25 years, e.g. adults 26 years and above or children 12 years and under. |
| - Participants that have had an experience of self-harm, suicidal ideation or behaviour.                                 | - Participants who are identified as heterosexual or not part of sexual or gender minority.               |
|                                                                                                                          | - Participants who have no experience of self-harm, suicidal ideation or suicidal behaviour.              |

158

159 Search strategy:

160 The search was limited to English language and was ran up to the 1<sup>st</sup> April 2019. No date restrictions  
 161 were applied. The following electronic bibliographic databases were searched: MEDLINE, Scopus,  
 162 EMBASE, PsycINFO, and Web of Science for peer-reviewed publications which examine risk factors  
 163 for self-harm or suicide within LGBTQ+ young people. The search strategy can be found in the  
 164 supplementary file 2. This was developed in collaboration with an academic skill specialist from the  
 165 University of Birmingham library to ensure the robustness of the search. Reference lists of eligible

## Systematic Review Protocol [Version 7, August 2019]

166 papers and conduct citation searches of key papers were explored to identify additional reports.  
167 Before the final draft of the systematic review is completed, a second search will be conducted to  
168 allow for any additional studies to be identified.

169 Study records:

170 *Selection process:* The search strategy will retrieve titles and/or abstracts which will be screened by  
171 two independent researchers to identify studies which potentially meet the inclusion criteria  
172 outlined above. The full-texts of the studies will be retrieved and independently assessed for  
173 eligibility. Any disagreement or uncertainty over the eligibility of particular studies will be resolved  
174 through discussion by two independent researchers.

175 *Data management and collection:* Rayyan QCRI (<https://rayyan.qcri.org/welcome>), the online  
176 systematic review tool, will be used to manage and screen all retrieved papers. AJW will be the solo  
177 team member responsible for adding or amending paper records in Rayyan, as well as identifying  
178 and removing duplicates. A second independent reviewer will be given access to all titles and  
179 abstracts, within Rayyan. They will be able to make their own decision as to whether to include or  
180 exclude a paper, blind to AJW's decisions. AJW will also be blind to the decisions of the second  
181 reviewer until all titles and abstracts are reviewed. Rayyan will provide information on the original  
182 number of titles screened, duplications, those excluded at this stage, and those included titles at this  
183 stage.

184 Those papers which reach full-text screening will be managed within Zotero  
185 (<https://www.zotero.org/>), the bibliographic software. These will be sectioned by those included at  
186 full-text screening, and final inclusion. Reason for exclusion will be reported for each paper. AJW will  
187 be responsible for liaising with inter-library loans and obtaining the full-text papers. Full-text  
188 screening will again be conducted by two researchers, blind to each other's decisions, who will  
189 resolve disagreements through discussion. If an agreement cannot be reached regarding a paper,  
190 this will be rated by a third researcher.

191 A pre-piloted standardised data extraction tool will be adapted and used on included studies[57].  
192 Extracted information will include: 1) author and publication date; 2) study design and setting; 3)  
193 characteristics of participants (age, gender identity), and the studies' inclusion and exclusion criteria;  
194 4) method of harm (self-harm, suicidal behaviour or ideation); 5) factors associated with or  
195 predictive of self-harm or suicidal ideation and behaviour (including clinician diagnosis, subscales or  
196 validated scales used to assess these items); 6) information relating to risk of bias for the individual  
197 study.

198 *Risk of bias (quality assessment):* The overall quality of each study will be evaluated by two  
199 independent researchers using the Newcastle-Ottawa Scale (NOS)[47] and the Newcastle-Ottawa  
200 Scale adapted for cross-sectional studies[48]. Alternative study designs which are not covered in  
201 these versions of NOS, will be assessed using a pre-piloted version developed for a previous  
202 systematic review[57]. The level of agreement will be demonstrated by Cohen's Kappa and a  
203 Prevalence and Bias-Adjusted Kappa (PABAK) score.

204 *Data synthesis and assessment of heterogeneity:* Descriptive results of each included study will be  
205 presented in a table format, such as details regarding study design, participants, self-harm or suicidal  
206 ideation and behaviour methods and measures, identified factors and tools used to assess these.

207 A meta-analysis of risk factors for self-harm and suicidal ideation and behaviour using RevMan 5  
208 (<https://community.cochrane.org/help/tools-and-software/revman-5/revman-5-download>) may be  
209 conducted by pooling data on risk factors using a random-effects model with the assumption that  
210 populations have various effect sizes and weights studies from in- and between-study variance. This  
211 will consider the extent of heterogeneity, which will be determined using the  $I^2$  statistic. From this, a  
212 summary effect will be presented, associated 95% CI and  $p$  values. Odds ratio (OR) with 95%  
213 confidence intervals will present the overall synthesised measure of effect size. Publication bias will  
214 be assessed using funnel plots and Harbord-Egger test[58].

215 Additionally, consideration will be given to subgroup analysis if data allows, exploring heterogeneity  
216 by sexual and gender minorities; such that these studies are split by LGBQ and transgender; as even  
217 within this population it is recognised that the transgender population have high levels of suicide risk  
218 and self-harm[42, 59]. This will allow us to determine which risk factors are similar within sexual and  
219 gender minorities, and those that unique to the transgender population. Further examination of risk  
220 factors will be conducted by age difference, split by 12-18years and 19-25years.

221 The quality of the included studies will be considered when synthesising and analysing the findings in  
222 terms of the strength of evidence which they provide. A sensitivity analysis will be run to assess the  
223 robustness of the studies [60]. If statistical pooling is not possible, findings will follow a narrative  
224 synthesis as suggested by ERSC guidelines [61]. The analysis will take place over four steps; 1)  
225 developing a theory of which factors influence LGBTQ+ young people, 2) synthesising the findings, 3)  
226 exploring whether there are relationships within the data and what these might be, 4) assessing the  
227 robustness of the synthesis.

228 *Patient and Public Involvement:* No patients involved.

229

## 230 **ETHICS AND DISSEMINATION**

231 This is a systematic review of published literature and thereby ethical approval was not sought. It  
232 will be submitted to a peer-reviewed journal, be publicly disseminated at conferences focusing on  
233 mental health, self-harm and suicide prevention. Findings will also be shared through public  
234 engagement and involvement, particularly considering young LGBTQ+ individuals.

235

## 236 **DISCUSSION**

237 This systematic review will be the first to provide a rich, holistic account of the existing evidence of  
238 risk factors for self-harm and suicidality within a broad sample of LGBTQ+ young people. The  
239 synthesis of these findings will assess the prevalence of particular factors which impact this  
240 population, which may not be relevant to non-sexual or gender minority young people.  
241 Acknowledging the similarities and differences of risk factors between sexual orientation and gender

1  
2  
3 242 identity groups could be used as a valuable stepping stone when considering LGBTQ+ research and  
4 243 promoting more applicable research aims.

5  
6 244 The quality and strength of the evidence will be rigorously assessed, which could be used to inform  
7 245 future research targeting these particular risks. This could ultimately help to inform self-harm and  
8 246 suicidality prevention within LGBTQ+ young people. It is anticipated that the findings of this review  
9 247 will be of interest to the wider academic and clinical community, policymakers, young people who  
10 248 identify as a sexual or gender minority, those with experience of self-harm or suicide.

11  
12  
13  
14 249

15  
16 250 **AUTHORS CONTRIBUTIONS**

17  
18 251 AJW, JA, ET, and MM conceptualised the study. AJW developed the search strategy and conducted  
19 252 the literature search. AJW and MM wrote the first draft of the manuscript. AJW, JA, ET, and MM  
20 253 authors reviewed, edited, and approved the final manuscript.

21  
22  
23 254

24  
25 255 **FUNDING STATEMENT**

26  
27 256 This work was supported by the Midlands Graduate School ESRC DTP Joint Studentship awarded to  
28 257 A. Jess Williams. The funding body were not involved in the development of this protocol.

29  
30 258

31  
32 259 **COMPETING INTERESTS**

33  
34 260 None declared.  
35  
36  
37  
38  
39  
40  
41  
42  
43  
44  
45  
46  
47  
48  
49  
50  
51  
52  
53  
54  
55  
56  
57  
58  
59  
60

## 261 REFERENCES

- 1  
2  
3  
4  
5  
6  
7  
8  
9  
10  
11  
12  
13  
14  
15  
16  
17  
18  
19  
20  
21  
22  
23  
24  
25  
26  
27  
28  
29  
30  
31  
32  
33  
34  
35  
36  
37  
38  
39  
40  
41  
42  
43  
44  
45  
46  
47  
48  
49  
50  
51  
52  
53  
54  
55  
56  
57  
58  
59  
60
- 262 1. American Psychiatric Association. Diagnostic and statistical manual of mental disorders  
263 (DSM-5®). American Psychiatric Pub; 2013 May 22.
  - 264 2. World Health Organization. Suicide across the world. 2016. Available from:  
265 [https://www.who.int/mental\\_health/prevention/suicide/suicideprevent/en/](https://www.who.int/mental_health/prevention/suicide/suicideprevent/en/). Accessed 7  
266 January 2019.
  - 267 3. Office for National Statistics. Suicides in the United Kingdom, 2017 Registration – ONS. 2018.  
268 Available at: <https://www.ons.gov.uk/releases/suicidesintheuk2017registrations>. Accessed  
269 27 Feb. 2019.
  - 270 4. National Collaborating Centre for Mental Health. Self-harm: Longer Term Management  
271 (NICE Clinical Guideline 133). London: National Institute for Clinical Excellence 2011.
  - 272 5. Hawton, K., Saunders, K.E. and O'Connor, R.C., 2012. Self-harm and suicide in  
273 adolescents. *The Lancet*, 379(9834), pp.2373-2382.
  - 274 6. McManus S, Bebbington P, Jenkins R et al. Mental health and wellbeing in England: Adult  
275 Psychiatric Morbidity Survey 2014. Leeds: NHS Digital. 2016. Available  
276 at <http://digital.nhs.uk/catalogue/PUB21748>. [Accessed 27 Feb. 2019]
  - 277 7. Sakinofsky I. Repetition of suicidal behaviour. In: Hawton K, and Van Heeringen K eds. The  
278 International Handbook of Suicide and Attempted Suicide. Chichester: John Wiley & Sons  
279 Ltd, 2000:385–404.
  - 280 8. Hawton K, Bergen H, Cooper J, et al. Suicide following self-harm: findings from the  
281 Multicentre Study of self-harm in England, 2000–2012. *Journal of Affective Disorders*. 2015  
282 April;(175):147-151.
  - 283 9. Rodway C, Tham SG, Ibrahim S, et al. Suicide in children and young people in England: a  
284 consecutive case series. *The Lancet Psychiatry*. 2016 Aug 1;3(8):751-9.
  - 285 10. Jourian TJ. Evolving nature of sexual orientation and gender identity. *New Directions for*  
286 *Student Services*. 2015 Dec;(152):11-23.
  - 287 11. King M, Semlyen J, Tai SS, Killaspy H, Osborn D, Popelyuk D, Nazareth I. A systematic review  
288 of mental disorder, suicide, and deliberate self harm in lesbian, gay and bisexual people.  
289 *BMC psychiatry*. 2008 Dec;8(1):70.
  - 290 12. Plöderl M, Wagenmakers EJ, Tremblay P, Ramsay R, Kralovec K, Fartacek C, Fartacek R.  
291 Suicide risk and sexual orientation: a critical review. *Archives of Sexual Behavior*. 2013 Jul  
292 1;42(5):715-27.
  - 293 13. Hottes TS, Bogaert L, Rhodes AE, et al. Lifetime prevalence of suicide attempts among sexual  
294 minority adults by study sampling strategies: a systematic review and meta-analysis.  
295 *American journal of public health*. 2016 May;106(5):e1-2.
  - 296 14. Haas AP, Eliason M, Mays VM, Mathy RM, Cochran SD, D'Augelli AR, Silverman MM, Fisher  
297 PW, Hughes T, Rosario M, Russell ST. Suicide and suicide risk in lesbian, gay, bisexual, and  
298 transgender populations: Review and recommendations. *Journal of homosexuality*. 2010  
299 Dec 30;58(1):10-51.
  - 300 15. Richards C, Barker M. Sexuality and gender for mental health professionals: A practical  
301 guide. Sage; 2013 Oct 15.
  - 302 16. Whittle S, Turner L, Combs R, et al. Transgender EuroStudy: Legal Survey and Focus on the  
303 Transgender Experience of Health Care. Brussels, Belgium: ILGA Europe; 2008.  
304 <http://tgeu.org/sites/default/files/eurostudy.pdf>. Accessed 26 March 2019

## Systematic Review Protocol [Version 7, August 2019]

17. Bauer GR, Pyne J, Francino MC, et al. Suicidality among trans people in Ontario: implications for social work and social justice/La suicidabilité parmi les personnes trans en Ontario: implications en travail social et en justice sociale. *Serv Soc.* 2013;59:35–62.
18. Motmans J, de Biolley I, Debunne S. Being Transgender in Belgium: Mapping the Social and Legal Situation of Transgender People. Brussels: Institute for the Equality of Women and Men; 2010. [http://igvmiefh.belgium.be/nl/binaries/34%20-%20Transgender\\_ENG\\_tcm336-99783.pdf](http://igvmiefh.belgium.be/nl/binaries/34%20-%20Transgender_ENG_tcm336-99783.pdf). Accessed 26 March 2019
19. Grant JM, Mottet LA, Tanis J, et al. Injustice at Every Turn: A Report of the National Transgender Discrimination Survey. Washington, D.C.: National Center for Transgender Equality and National Gay and Lesbian Task Force; 2011. [http://www.thetaskforce.org/downloads/reports/reports/ntds\\_full.pdf](http://www.thetaskforce.org/downloads/reports/reports/ntds_full.pdf). Accessed 26 March 2019.
20. McNeil J, Bailey L, Ellis S, et al. Mental Health Study 2012. Edinburgh: Equality Network; 2012. [http://www.scottishtrans.org/Uploads/Resources/trans\\_mh\\_study.pdf](http://www.scottishtrans.org/Uploads/Resources/trans_mh_study.pdf). Accessed 26 March 2019.
21. Nock MK, Borges G, Bromet EJ, et al. Cross-national prevalence and risk factors for suicidal ideation, plans and attempts. *The British Journal of Psychiatry.* 2008 Feb;192(2):98-105.
22. Gratz KL. Risk factors for and functions of deliberate self-harm: An empirical and conceptual review. *Clinical Psychology: Science and Practice.* 2003 Jun;10(2):192-205.
23. Fliege H, Lee JR, Grimm A, et al. Risk factors and correlates of deliberate self-harm behavior: A systematic review. *Journal of psychosomatic research.* 2009 Jun 1;66(6):477-93.
24. Rodway C, Tham SG, Ibrahim S, et al. Suicide in children and young people in England: a consecutive case series. *The Lancet Psychiatry.* 2016 Aug 1;3(8):751-9.
25. Gili, M., Castellvi, P., Vives, M., de la Torre-Luque, A., Almenara, J., Blasco, M.J., Cebrià, A.I., Gabilondo, A., Pérez-Ara, M.A., Lagares, C. and Parés-Badell, O., 2018. Mental disorders as risk factors for suicidal behavior in young people: A meta-analysis and systematic review of longitudinal studies. *Journal of affective disorders.*
26. Hawton K, James A. Suicide and deliberate self harm in young people. *BMJ.* 2005;330(7496):891–4.
27. Semlyen J, King M, Varney J, et al. Sexual orientation and symptoms of common mental disorder or low wellbeing: combined meta-analysis of 12 UK population health surveys. *BMC psychiatry.* 2016 Dec;16(1):67.
28. Clements-Nolle K, Marx R, Katz M. Attempted suicide among transgender persons: The influence of gender-based discrimination and victimization. *Journal of homosexuality.* 2006 Oct 11;51(3):53-69.
29. Meyer IH. Minority stress and mental health in gay men. *Journal of health and social behavior.* 1995 Mar;1:38-56.
30. Meyer IH. Prejudice, social stress, and mental health in lesbian, gay, and bisexual populations: conceptual issues and research evidence. *Psychological bulletin.* 2003 Sep;129(5):674.
31. Cochran SD, Mays VM. Lifetime prevalence of suicide symptoms and affective disorders among men reporting same-sex sexual partners: results from NHANES III. *American journal of public health.* 2000 Apr;90(4):573.
32. Bontempo DE, d'Augelli AR. Effects of at-school victimization and sexual orientation on lesbian, gay, or bisexual youths' health risk behavior. *Journal of Adolescent Health.* 2002 May 1;30(5):364-74.

- 1  
2  
3 351 33. Grossman AH, D'augelli AR, Frank JA. Aspects of psychological resilience among transgender  
4 352 youth. *Journal of LGBT Youth*. 2011 Mar 29;8(2):103-15.  
5 353  
6 354 34. Brandelli Costa A, Pasley A, Machado WD, et al. The experience of sexual stigma and the  
7 354 increased risk of attempted suicide in young Brazilian people from low socioeconomic group.  
8 355 *Frontiers in psychology*. 2017 Feb 22;8:192.  
9 356  
10 357 35. Kelleher C. Minority stress and health: Implications for lesbian, gay, bisexual, transgender,  
11 357 and questioning (LGBTQ) young people. *Counselling psychology quarterly*. 2009 Dec  
12 358 1;22(4):373-9.  
13 359  
14 360 36. Taliaferro LA, Muehlenkamp JJ. Nonsuicidal self-injury and suicidality among sexual minority  
15 360 youth: risk factors and protective connectedness factors. *Academic pediatrics*. 2017 Sep  
16 361 1;17(7):715-22.  
17 362  
18 362 37. Puckett, J.A., Newcomb, M.E., Ryan, D.T., Swann, G., Garofalo, R. and Mustanski, B., 2017.  
19 363 Internalized homophobia and perceived stigma: A validation study of stigma measures in a  
20 364 sample of young men who have sex with men. *Sexuality Research and Social Policy*, 14(1),  
21 365 pp.1-16.  
22 366  
23 366 38. McDermott E, Hughes E, Rawlings V. The social determinants of lesbian, gay, bisexual and  
24 367 transgender youth suicidality in England: a mixed methods study. *Journal of Public Health*.  
25 368 2017 Oct 17;40(3):e244-51.  
26 369  
27 369 39. Klonsky ED. The functions of deliberate self-injury: A review of the evidence. *Clinical*  
28 370 *psychology review*. 2007 Mar 1;27(2):226-39.  
29 371  
30 371 40. Skegg K. Self-harm. *The Lancet*. 2005 Oct 22;366(9495):1471-83.  
31 372  
32 372 41. Edmondson AJ, Brennan CA, House AO. Non-suicidal reasons for self-harm: a systematic  
33 373 review of self-reported accounts. *Journal of Affective Disorders*. 2016 Feb 1;191:109-17.  
34 374  
35 374 42. Marshall E, Claes L, Bouman WP, et al. Non-suicidal self-injury and suicidality in trans people:  
36 375 a systematic review of the literature. *International review of psychiatry*. 2016 Jan 2;28(1):58-  
37 376 69.  
38 377  
39 377 43. Miranda-Mendizábal, A., Castellví, P., Parés-Badell, O., Almenara, J., Alonso, I., Blasco, M.J.,  
40 378 Cebrià, A., Gabilondo, A., Gili, M., Lagares, C. and Piqueras, J.A., 2017. Sexual orientation and  
41 379 suicidal behaviour in adolescents and young adults: systematic review and meta-  
42 380 analysis. *The British Journal of Psychiatry*, 211(2), pp.77-87.  
43 381  
44 381 44. Marshal MP, Dietz LJ, Friedman MS, et al. Suicidality and depression disparities between  
45 382 sexual minority and heterosexual youth: A meta-analytic review. *Journal of adolescent*  
46 383 *health*. 2011 Aug 1;49(2):115-23.  
47 384  
48 384 45. E Mann G, Taylor A, Wren B, et al. Review of the literature on self-injurious thoughts and  
49 385 behaviours in gender-diverse children and young people in the United Kingdom. *Clinical child*  
50 386 *psychology and psychiatry*. 2018:1359104518812724.  
51 387  
52 387 46. Shamseer L, Moher D, Clarke M, et al. Preferred reporting items for systematic review and  
53 388 meta-analysis protocols (PRISMA-P) 2015: elaboration and explanation. *Bmj*. 2015 Jan  
54 389 2;349:g7647.  
55 390  
56 390 47. Wells G, Shea B, O'Connell D, et al. Newcastle-Ottawa quality assessment scale cohort  
57 391 studies. 2011. [http://www.ohri.ca/programs/clinical\\_epidemiology/oxford.asp](http://www.ohri.ca/programs/clinical_epidemiology/oxford.asp).  
58 392  
59 392 48. Herzog R, Álvarez-Pasquin MJ, Díaz C, et al. Are healthcare workers' intentions to vaccinate  
60 393 related to their knowledge, beliefs and attitudes? A systematic review. *BMC public health*.  
2013 Dec;13(1):154.

## Systematic Review Protocol [Version 7, August 2019]

- 1  
2  
3 395 49. Beck AT, Steer RA, Ranieri WF. Scale for suicide ideation: psychometric properties of a  
4 396 self-report version. *Journal of clinical psychology*. 1988 Jul;44(4):499-505.  
5 397  
6 397 50. Bostrom AG, Cronbach J. Development of a clinical instrument to estimate suicide risk. *Am J*  
7 398 *Psychiatry*. 1985 Jun 6;142(6):680-6.  
8 399  
9 399 51. Muehlenkamp JJ, Gutierrez PM, Osman A, et al. Validation of the Positive and Negative  
10 400 Suicide Ideation (PANSI) Inventory in a diverse sample of young adults. *Journal of Clinical*  
11 401 *Psychology*. 2005 Apr;61(4):431-45.  
12 402  
13 402 52. Posner K, Brown GK, Stanley B, et al. The Columbia–Suicide Severity Rating Scale: initial  
14 403 validity and internal consistency findings from three multisite studies with adolescents and  
15 404 adults. *American Journal of Psychiatry*. 2011 Dec;168(12):1266-77.  
16 405  
17 405 53. Sansone RA, Wiederman MW, Sansone LA. The self-harm inventory (SHI): Development of a  
18 406 scale for identifying self-destructive behaviors and borderline personality disorder. *Journal*  
19 407 *of clinical psychology*. 1998 Nov;54(7):973-83.  
20 408  
21 408 54. Nock MK, Holmberg EB, Photos VI, Michel BD. Self-Injurious Thoughts and Behaviors  
22 409 Interview: Development, reliability, and validity in an adolescent sample.  
23 410  
24 410 55. Boudewyn AC, Liem JH. Mental health history form. 1995. *Unpublished measure, University*  
25 411 *of Massachusetts Boston*.  
26 412  
27 412 56. Taylor PJ, Dhingra K, Dickson JM, et al. Psychological correlates of self-harm within gay,  
28 413 lesbian and bisexual UK University students. *Archives of suicide research*. 2018 Sep 28:1-6.  
29 414  
30 414 57. Knipe D, Williams AJ, Hannan-Swain S, et al. Psychiatric morbidity and suicidal behaviour in  
31 415 low and middle-income countries: A systematic review and meta-analysis. (*in press*)  
32 416  
33 416 58. Harbord RM, Egger M, Sterne JA. A modified test for small-study effects in meta-analyses of  
34 417 controlled trials with binary endpoints. *Statistics in medicine*. 2006 Oct 30;25(20):3443-57.  
35 418  
36 418 59. Arcelus J, Claes L, Witcomb GL, et al. Risk factors for non-suicidal self-injury among trans  
37 419 youth. *The Journal of Sexual Medicine*. 2016 Mar 1;13(3):402-12.  
38 420  
39 420 60. Deeks JJ, Higgins JP, Altman DG. Analysing data and undertaking meta-analyses. *Cochrane*  
40 421 *handbook for systematic reviews of interventions: Cochrane book series*. 2008 Sep 26:243-  
41 422 96.  
42 423  
43 423 61. Popay J, Roberts H, Sowden A, et al. Guidance on the conduct of narrative synthesis in  
44 424 systematic reviews. A product from the ESRC methods programme Version. 2006 Apr  
45 425 1;1:b92.



## PRISMA-P 2015 Checklist

This checklist has been adapted for use with protocol submissions to *Systematic Reviews* from Table 3 in Moher D et al: Preferred reporting items for systematic review and meta-analysis protocols (PRISMA-P) 2015 statement. *Systematic Reviews* 2015 4:1

| Section/topic                     | #  | Checklist item                                                                                                                                                                                  | Information reported                |                                     | Line number(s) |
|-----------------------------------|----|-------------------------------------------------------------------------------------------------------------------------------------------------------------------------------------------------|-------------------------------------|-------------------------------------|----------------|
|                                   |    |                                                                                                                                                                                                 | Yes                                 | No                                  |                |
| <b>ADMINISTRATIVE INFORMATION</b> |    |                                                                                                                                                                                                 |                                     |                                     |                |
| <b>Title</b>                      |    |                                                                                                                                                                                                 |                                     |                                     |                |
| Identification                    | 1a | Identify the report as a protocol of a systematic review                                                                                                                                        | <input checked="" type="checkbox"/> | <input type="checkbox"/>            | 1              |
| Update                            | 1b | If the protocol is for an update of a previous systematic review, identify as such                                                                                                              | <input type="checkbox"/>            | <input checked="" type="checkbox"/> |                |
| <b>Registration</b>               | 2  | If registered, provide the name of the registry (e.g., PROSPERO) and registration number in the Abstract                                                                                        | <input checked="" type="checkbox"/> | <input type="checkbox"/>            | 48             |
| <b>Authors</b>                    |    |                                                                                                                                                                                                 |                                     |                                     |                |
| Contact                           | 3a | Provide name, institutional affiliation, and e-mail address of all protocol authors; provide physical mailing address of corresponding author                                                   | <input checked="" type="checkbox"/> | <input type="checkbox"/>            | 4-20           |
| Contributions                     | 3b | Describe contributions of protocol authors and identify the guarantor of the review                                                                                                             | <input checked="" type="checkbox"/> | <input type="checkbox"/>            | 250-253        |
| <b>Amendments</b>                 | 4  | If the protocol represents an amendment of a previously completed or published protocol, identify as such and list changes; otherwise, state plan for documenting important protocol amendments | <input type="checkbox"/>            | <input checked="" type="checkbox"/> |                |
| <b>Support</b>                    |    |                                                                                                                                                                                                 |                                     |                                     |                |
| Sources                           | 5a | Indicate sources of financial or other support for the review                                                                                                                                   | <input checked="" type="checkbox"/> | <input type="checkbox"/>            | 255-257        |
| Sponsor                           | 5b | Provide name for the review funder and/or sponsor                                                                                                                                               | <input checked="" type="checkbox"/> | <input type="checkbox"/>            | 256            |
| Role of sponsor/funder            | 5c | Describe roles of funder(s), sponsor(s), and/or institution(s), if any, in developing the protocol                                                                                              | <input checked="" type="checkbox"/> | <input type="checkbox"/>            | 257            |
| <b>INTRODUCTION</b>               |    |                                                                                                                                                                                                 |                                     |                                     |                |
| <b>Rationale</b>                  | 6  | Describe the rationale for the review in the context of what is already known                                                                                                                   | <input checked="" type="checkbox"/> | <input type="checkbox"/>            | 60-112         |
| <b>Objectives</b>                 | 7  | Provide an explicit statement of the question(s) the review will address with reference to participants, interventions, comparators, and outcomes (PICO)                                        | <input checked="" type="checkbox"/> | <input type="checkbox"/>            | 113-118        |

| Section/topic                      | #   | Checklist item                                                                                                                                                                                                                              | Information reported |                          | Line number(s) |
|------------------------------------|-----|---------------------------------------------------------------------------------------------------------------------------------------------------------------------------------------------------------------------------------------------|----------------------|--------------------------|----------------|
|                                    |     |                                                                                                                                                                                                                                             | Yes                  | No                       |                |
| <b>METHODS</b>                     |     |                                                                                                                                                                                                                                             |                      |                          |                |
| Eligibility criteria               | 8   | Specify the study characteristics (e.g., PICO, study design, setting, time frame) and report characteristics (e.g., years considered, language, publication status) to be used as criteria for eligibility for the review                   | √                    | <input type="checkbox"/> | 128-157        |
| Information sources                | 9   | Describe all intended information sources (e.g., electronic databases, contact with study authors, trial registers, or other grey literature sources) with planned dates of coverage                                                        | √                    | <input type="checkbox"/> | 160-168        |
| Search strategy                    | 10  | Present draft of search strategy to be used for at least one electronic database, including planned limits, such that it could be repeated                                                                                                  | √                    | <input type="checkbox"/> | Sup file 2     |
| <b>STUDY RECORDS</b>               |     |                                                                                                                                                                                                                                             |                      |                          |                |
| Data management                    | 11a | Describe the mechanism(s) that will be used to manage records and data throughout the review                                                                                                                                                | √                    | <input type="checkbox"/> | 175-197        |
| Selection process                  | 11b | State the process that will be used for selecting studies (e.g., two independent reviewers) through each phase of the review (i.e., screening, eligibility, and inclusion in meta-analysis)                                                 | √                    | <input type="checkbox"/> | 170-174        |
| Data collection process            | 11c | Describe planned method of extracting data from reports (e.g., piloting forms, done independently, in duplicate), any processes for obtaining and confirming data from investigators                                                        | √                    | <input type="checkbox"/> | 175-197        |
| Data items                         | 12  | List and define all variables for which data will be sought (e.g., PICO items, funding sources), any pre-planned data assumptions and simplifications                                                                                       | √                    | <input type="checkbox"/> | 191-197        |
| Outcomes and prioritization        | 13  | List and define all outcomes for which data will be sought, including prioritization of main and additional outcomes, with rationale                                                                                                        | √                    | <input type="checkbox"/> | 146-156        |
| Risk of bias in individual studies | 14  | Describe anticipated methods for assessing risk of bias of individual studies, including whether this will be done at the outcome or study level, or both; state how this information will be used in data synthesis                        | √                    | <input type="checkbox"/> | 198-203        |
| <b>DATA</b>                        |     |                                                                                                                                                                                                                                             |                      |                          |                |
| Synthesis                          | 15a | Describe criteria under which study data will be quantitatively synthesized                                                                                                                                                                 | √                    | <input type="checkbox"/> | 204-222        |
|                                    | 15b | If data are appropriate for quantitative synthesis, describe planned summary measures, methods of handling data, and methods of combining data from studies, including any planned exploration of consistency (e.g., $I^2$ , Kendall's tau) | √                    | <input type="checkbox"/> | 207-214        |
|                                    | 15c | Describe any proposed additional analyses (e.g., sensitivity or subgroup analyses, meta-regression)                                                                                                                                         | √                    | <input type="checkbox"/> | 215-220        |
|                                    | 15d | If quantitative synthesis is not appropriate, describe the type of summary planned                                                                                                                                                          | √                    | <input type="checkbox"/> | 223-227        |
| Meta-bias(es)                      | 16  | Specify any planned assessment of meta-bias(es) (e.g., publication bias across studies, selective                                                                                                                                           | √                    | <input type="checkbox"/> | 221-223        |

1  
2  
3  
4  
5  
6  
7  
8  
9  
10  
11  
12  
13  
14  
15  
16  
17  
18  
19  
20  
21  
22  
23  
24  
25  
26  
27  
28  
29  
30  
31  
32  
33  
34  
35  
36  
37  
38  
39  
40  
41  
42  
43  
44  
45  
46

| Section/topic                            | #  | Checklist item                                                                   | Information reported |                          | Line number(s) |
|------------------------------------------|----|----------------------------------------------------------------------------------|----------------------|--------------------------|----------------|
|                                          |    |                                                                                  | Yes                  | No                       |                |
|                                          |    | reporting within studies)                                                        |                      |                          |                |
| <b>Confidence in cumulative evidence</b> | 17 | Describe how the strength of the body of evidence will be assessed (e.g., GRADE) | ✓                    | <input type="checkbox"/> | 198-203        |

For peer review only

**SUPPLEMENTARY FILE 2****Search strategy terms:**

(self-harm OR self harm\* OR self-injur\* OR "self injur\*" OR self-cut\* OR self-destruct\* OR "self destruct\*" OR "nonsuicidal self-injur\*" OR "non-suicidal self injur\*" OR "deliberate self harm" OR "deliberate self-harm" OR DSH OR "self-mutil\*" OR overdos\* OR self-inflicted injur\* OR "self inflicted injur\*" OR suicid\* OR "parasuicid\*" OR para-suicid\* OR parasuicid\* OR suicidal behav\* OR suicide\* OR "life-threatening behavio\*" OR "suicide ideat\*" OR "suicide attempt\*" OR "attempted suicide\*" OR NSSI)

AND

(moderat\* OR mediat\* OR "risk facto\*" OR mechan\* OR predict\* OR pathway OR interact\* OR "protective facto\*" OR facto\* OR influence OR correlate\* OR precurs\* OR "causal facto\*")

AND

(transgender\* OR transsexual\* OR "gender nonconforming" OR "gender identity disorder" OR "gender dysphoria" OR "gender minority" OR lesbian\* OR gay\* OR bisexual\* OR "sexual minority" OR "same-sex" OR homosexual\* OR "homosexuality, male" OR "homosexuality, female" OR "gender identity" OR non-heterosexual\* OR "non heterosexual\*" OR homosexuality OR queer\* OR questioning OR "non-binary" OR "non binary" OR "LGBT\*" OR "sexual dissident\*" OR "sexual and gender minorities" OR "gender variant" OR gender-variant OR genderqueer OR intersex OR "minority groups" OR "TGNC" OR "transgender and gender nonconforming")

AND

(Child\* OR adolesc\* OR "young people" OR kid\* OR pupils OR youth OR juvenile OR "young adult\*" OR "young person" OR minor\*)

# BMJ Open

## A systematic review protocol examining risk factors for self-harm and suicide in LGBTQ+ young people

|                                 |                                                                                                                                                                                                                                                                     |
|---------------------------------|---------------------------------------------------------------------------------------------------------------------------------------------------------------------------------------------------------------------------------------------------------------------|
| Journal:                        | <i>BMJ Open</i>                                                                                                                                                                                                                                                     |
| Manuscript ID                   | bmjopen-2019-031541.R2                                                                                                                                                                                                                                              |
| Article Type:                   | Protocol                                                                                                                                                                                                                                                            |
| Date Submitted by the Author:   | 16-Sep-2019                                                                                                                                                                                                                                                         |
| Complete List of Authors:       | Williams, A. Jess; University of Birmingham, School of Psychology<br>Arcelus, J; University of Nottingham , School of Medicine<br>Townsend, Ellen; University of Nottingham, School of Psychology<br>Michail, Maria; University of Birmingham, School of Psychology |
| <b>Primary Subject Heading</b>: | Mental health                                                                                                                                                                                                                                                       |
| Secondary Subject Heading:      | Public health, Research methods                                                                                                                                                                                                                                     |
| Keywords:                       | Suicide & self-harm < PSYCHIATRY, gender identity, young people, sexual orientation, systematic review, protocol                                                                                                                                                    |
|                                 |                                                                                                                                                                                                                                                                     |

SCHOLARONE™  
Manuscripts

1  
2  
3 **1 A systematic review protocol examining risk factors for self-harm and suicide in LGBTQ+ young**  
4 **2 people**  
5  
6  
7 3

8  
9 4 A. Jess Williams\*<sup>1,2</sup> (a.williams.10@pgr.bham.ac.uk), Jon Arcelus<sup>3</sup> (jon.arcelus@nottingham.ac.uk),  
10 5 Ellen Townsend<sup>2</sup> (ellen.townsend@nottingham.ac.uk), Maria Michail<sup>1</sup> (m.michail@bham.ac.uk)  
11  
12 6

13  
14 7 <sup>1</sup>Institute for Mental Health, School of Psychology, University of Birmingham, UK  
15

16 8 <sup>2</sup>Self-Harm Research Group, School of Psychology, University of Nottingham, UK  
17

18 9 <sup>3</sup>Institute of Mental Health, School of Medicine, University of Nottingham, UK  
19  
20  
21 10  
22  
23 11  
24  
25 12

26  
27 13 \* Corresponding author  
28

29 14 52 Pritchatts Road,  
30

31 15 School of Psychology  
32

33 16 Institute for Mental Health  
34

35 17 University of Birmingham  
36

37 18 B15 2TT  
38

39 19 [a.williams.10@pgr.bham.ac.uk](mailto:a.williams.10@pgr.bham.ac.uk)  
40  
41

42 20 Tel. +(44)121 4142855  
43  
44 21  
45  
46 22  
47

48 23 Word count: 2594 (excluding title page, abstract, references, figures and tables)  
49  
50  
51 24

52 25 Key words:  
53

54 26 Self-harm, suicide, sexual orientation, gender identity, young people  
55  
56  
57 27  
58  
59  
60

## 28 ABSTRACT

29 Introduction: Young people who identify as LGBTQ+ are at increased risk for self-harm, suicide  
30 ideation and behaviours. However, there has yet to be a comprehensive understanding of what risk  
31 factors influence these behaviours within LGBTQ+ young people as a whole. The purpose of this  
32 systematic review is to examine risk factors associated with self-harm, suicidal ideation and  
33 behaviour in Lesbian, Gay, Bisexual, Transgender, Queer or Questioning (LGBTQ+) young people.

34 Methods and analysis: A systematic review will be conducted, conforming to the reporting  
35 guidelines of the Preferred Reporting Items for Systematic Reviews and Meta-Analyses (PRISMA)  
36 statement recommendations. Electronic databases (MEDLINE, Scopus, EMBASE, PsycINFO, and Web  
37 of Science) will be systematically searched for cross-sectional, prospective, longitudinal, cohort, and  
38 case-control designs which examine risk factors for self-harm and/or suicidal ideation and behaviour  
39 in LGBTQ+ young people (aged 12-25 years). Only studies published in English will be included. No  
40 date restrictions will be applied. Study quality assessment will be conducted using the original and  
41 modified Newcastle-Ottawa Scales. Meta-analysis or narrative synthesis will be utilised, dependent  
42 on findings.

43 Ethics and dissemination: This is a systematic review of published literature and thereby ethical  
44 approval was not sought. The review will be submitted to a peer-reviewed journal, be publicly  
45 disseminated at conferences focusing on mental health, self-harm and suicide prevention. The  
46 findings will also be shared through public engagement and involvement, particularly those related  
47 to young LGBTQ+ individuals.

48 PROSPERO registration number: CRD42019130037

## 50 STRENGTHS AND LIMITATIONS OF THIS STUDY

- 51 • This is the first systematic review of risk factors for both self-harm as an individual  
52 behaviour, and suicidal ideation and suicidal behaviour among LGBTQ+ young people.
- 53 • The protocol has been written following the PRISMA-P guidelines (2015).
- 54 • The robust search strategy was conducted with input from an academic skills specialist to  
55 ensure replication across all databases, and capture a large range of papers.
- 56 • The systematic review will follow the Cochrane Review guidelines.
- 57 • A limitation of this systematic review is the exclusion of studies which are not published in  
58 English; this may bias findings against non-English speaking countries.

## 60 INTRODUCTION

61 Suicide, intentionally ending one's own life[1], is one of the leading causes of death within young  
62 people[2-3]. Globally, suicide accounts for around 131,441 deaths between the ages of 15-24[2].  
63 Rates of self-harm, the self-injury or poisoning of one's self irrespective of suicidal intent[4], are on  
64 the rise among young people[5]. Data from the 2014 UK Adult Morbidity Survey states that 25.7% of  
65 women and 9.7% of men were likely to have self-harmed between the ages of 16-24 years[6].  
66 Approximately 50% of those who die by suicide have previously self-harmed, making self-harm one  
67 of the strongest predictors of suicide[7-9].

68 Among people who identify under the umbrella term LGBTQ+ (Lesbian, Gay, Bisexual, Transgender,  
69 Queer or Questioning), this being how one self-identifies as their sex, sexuality, gender identity and  
70 gender expression[10], there are elevated rates of suicidal ideation (thoughts of self-harm, the  
71 consideration or planning of suicide[1]) and suicidal behaviour[11-13]. King et al's 2008 systematic  
72 review found that lesbian, gay and bisexual (LGB) individuals were found to be at higher risk for both  
73 suicidal behaviour and ideation compared to heterosexuals[11]. Internationally, this has been  
74 estimated to be between four to eight times higher in LGB and transgender (T) young people when  
75 compared to the heterosexual and cisgender peers[14]. While as a broad group, sexual and gender  
76 minorities have high levels of suicidal ideation and behaviour, among transgender people  
77 (individuals who do not present or identify with their sex assigned at birth[15]) these rates are even  
78 greater. Indeed, lifetime risk for suicide attempt is estimated to be between 22-43%, with 9-10%  
79 having made an attempt in the past 12 months[16-20].

80 Previous research has examined potential risk factors for self-harm and suicide in young people in  
81 general populations. These risk factors range from demographic characteristics such as being female,  
82 being a younger adult or adolescent, having fewer qualifications[21], to childhood abuse and  
83 neglect[22-23]. Additional risks such as bullying and academic pressure have been linked to suicidal  
84 behaviour in young people[9], as well as any mental health disorder[24]. Other factors which relate  
85 to the risk of self-harm repetition include troubled relationships with family members, social  
86 isolation, poor academic performance, alcohol and drug misuse, and depression[25].

87 Given the heightened risk of suicide attempt within LGBTQ+[11-13, 26], it would be pertinent to  
88 explore which factors specifically pose as a risk to this population. Although some of these risk  
89 factors may overlap with those from non-LGBTQ+ populations (e.g. depression, substance or alcohol  
90 misuse)[11, 27], there are also unique risk factors to sexual and gender minorities. For example,  
91 Clements-Nolle et al[27] stated that experiences of abuse, discrimination or harassment due to an  
92 individual's gender identity or presentation were also linked to high levels of attempted suicide.  
93 Meyer[28-29] suggested that additional risk within homosexual communities may be related to the  
94 high levels of stigma, prejudice and discrimination which thereby impacts individual's mental  
95 wellbeing. Victimisation or discrimination due to sexual orientation and gender identity is  
96 particularly common within LGBTQ+ populations[30-33]. In addition, among LGBTQ+ young people  
97 these experiences were found to be significantly associated with suicidal ideation[34-35]. It is  
98 suggested that young people may internalise these experiences of public stigma in relation to being  
99 LGBTQ+, known as internalised homophobia[36], which can lead to adverse impacts on their self-  
100 perception and beliefs, which could then enhance suicidal ideation, behaviour or self-harm[37].

101



## 102 Why this review is important

103 The goal of this systematic review is to comprehensively examine risk factors for self-harm and  
104 suicide ideation and behaviour within LGBTQ+ young people. Identifying and understanding how  
105 these factors relate to self-harm and suicide could allow future research to address specific risks and  
106 streamline potential studies to target the mental health needs of this population. Previous reviews  
107 regarding various dimensions of self-harm[22-23, 38-40] have focused on a specific subgroup, such  
108 as the prevalence within transgender population[41] or sexual orientation[42]. Whereas, few have  
109 considered both self-harm and suicide in relation to LGBTQ+ populations as a broad group[11, 42-  
110 44]. Thus, this review not only takes a dimensional approach to include self-harmful thoughts and  
111 behaviour with and without intent of suicide, thereby covering a wide spectrum of suicide and self-  
112 harm, but also includes all sexual and gender minorities.

113 Objectives:

- 114 1) To examine risk factors associated with self-harm and suicide ideation and behaviour in  
115 LGBTQ+ young people.
- 116 2) To examine whether there is a difference between sexual orientation minority young people  
117 and gender identity minority young people in the type of risk factors for self-harm, suicidal  
118 ideation and behaviour.

## 120 METHODS

121 A systematic review of empirical quantitative studies which examine risk factors for self-harm and  
122 suicidal ideation and behaviour in LGBTQ+ young people will be conducted. The search considered  
123 all studies up to the 1<sup>st</sup> of April 2019, a summary of eligibility criteria is shown in table 1. This  
124 protocol follows the Preferred Reporting Items for Systematic Reviews and Meta-Analyses Protocol  
125 (PRISMA-P) guidelines[45], presented in the supplementary file 1. Study quality will be assessed by  
126 the Newcastle-Ottawa Scale (NOS)[46] and the adapted version for cross-sectional studies[47]. The  
127 protocol for this article has been registered with PROSPERO: CRD42019130037.

128 Eligibility criteria: see table 1 for summary:

129 *Types of studies:* These include empirical quantitative peer reviewed studies following cross-  
130 sectional, prospective, longitudinal, cohort, and case-control designs which examine risk factors for  
131 self-harm and/or suicidal ideation and behaviour in LGBTQ+ young people. Risk factors being  
132 identified as significant predictors, mediators or moderators which influence a self-harm or suicidal  
133 outcome. These papers may specifically focus on one subgroup of the LGBTQ+ umbrella (e.g.  
134 transgender) or look across groups (e.g. LGB). Mixed-method papers which have applicable  
135 extractable information will also be included. Grey literature such as theses, dissertations or  
136 conference proceedings will not be included. Commentary, reviews, editorial or opinion pieces will  
137 also be excluded. All included studies must be available as full-text and peer-reviewed in the English  
138 language.

139 *Types of participants:* Participants between the ages of 12-25 years old, who identify as LGBTQ+  
140 (Lesbian, Gay, Bisexual, Transgender, Queer or Questioning) referring to how one self-identifies as  
141 their sex, sexuality, gender identity and gender expression[10]. This age range was selected to mirror

142 papers within the field that consider young people up to the age of 25 years[9,48], with the lower  
 143 limit extended to 12 years to include the adolescent period. Participants will also have had  
 144 experiences of self-harm (self-injury or poisoning irrespective of suicidal intention[4]), suicide  
 145 ideation (this can include thoughts of self-harm, the consideration or planning of a suicidal attempt  
 146 e.g. method[1]) or suicidal behaviour (intentionally trying to end one's own life[1]). Alternatively, if  
 147 participants met the above inclusion criteria as a subgroup, this data will be extracted.

148 *Types of outcome measures:* Studies will be included if they used a measure for self-harm, suicidal  
 149 ideation or suicidal behaviour. The measurements of self-harm (any, with intent, without intent) and  
 150 suicidal behaviour; attempt or death, will be taken as binary variables; present or absence.  
 151 Continuous scales for suicidal ideation will be converted to binary variables by considering the  
 152 original scale threshold. This will act as a cut-off point, if the population mean for ideation is above  
 153 this threshold, ideation will be considered present, whereas below the threshold, ideation will be  
 154 considered absent. The psychometric measures of these outcomes will be extracted for descriptive  
 155 purposes. This can be specific tools for considering suicide e.g. Beck Scale for Suicide Ideation  
 156 (SSI)[49]; Motto's Risk Estimator for Suicide[50]; Positive and Negative Suicide Ideation (PANSI)[51];  
 157 Columbia-Suicide Severity Rating Scale[52]; or self-harm e.g. Self-Harm Inventory (SHI)[53];  
 158 Inventory of Statements about Self-injury (ISAS)[38]; Self-Injurious Thoughts and Behaviour  
 159 Interview (SITBI) Short Form[54]. Also included will be self-harm or suicide items from general scales  
 160 such as items 102-105 from the Mental Health History Form[Boudewyn & Liem, 1995; Mental Health  
 161 History Form] or individual questions regarding self-harm or suicide had ever been considered or  
 162 acted upon[55] and clinician reports.

163 *Table 1: Inclusion and exclusion criteria for papers*

| Inclusion Criteria                                                                                                       | Exclusion criteria                                                                                        |
|--------------------------------------------------------------------------------------------------------------------------|-----------------------------------------------------------------------------------------------------------|
| - Peer reviewed studies.                                                                                                 | - Non-peer reviewed literature.                                                                           |
| - Any geographical location.                                                                                             | - Not English language.                                                                                   |
| - English language.                                                                                                      | - Grey literature such as theses, dissertation or conference proceedings.                                 |
| - Empirical quantitative studies, following cross-sectional, prospective, longitudinal, cohort and case-control designs. | - Articles such as commentaries, reviews, editorial or opinion pieces.                                    |
| - Studies must consider factors associated with or predictive of self-harm, suicidal ideation or suicidal behaviour.     | - Empirical qualitative studies.                                                                          |
| - Participants must be young people (12-25 years).                                                                       | - Sample not aged between 12 and 25 years, e.g. adults 26 years and above or children 12 years and under. |
| - Participants that are identified or self-identified as any sexual or gender minority or member of LGBTQ+.              | - Participants who are identified as heterosexual or not part of sexual or gender minority.               |
| - Participants that have had an experience of self-harm, suicidal ideation or behaviour.                                 | - Participants who have no experience of self-harm, suicidal ideation or suicidal behaviour.              |

164

165 Search strategy:

1  
2  
3 166 The search was limited to English language and was run up to the 1<sup>st</sup> April 2019. No date restrictions  
4 167 were applied. The following electronic bibliographic databases were searched: MEDLINE, Scopus,  
5 168 EMBASE, PsycINFO, and Web of Science for peer-reviewed publications which examine risk factors  
6 169 for self-harm or suicide within LGBTQ+ young people. The search strategy can be found in the  
7 170 supplementary file 2. This was developed in collaboration with an academic skill specialist from the  
8 171 University of Birmingham library to ensure the robustness of the search. Reference lists of eligible  
9 172 papers and conduct citation searches of key papers were explored to identify additional reports.  
10 173 Before the final draft of the systematic review is completed, a second search will be conducted to  
11 174 allow for any additional studies to be identified.

12  
13  
14  
15 175 Study records:

16  
17  
18 176 *Selection process:* The search strategy will retrieve titles and/or abstracts which will be screened by  
19 177 two independent researchers to identify studies which potentially meet the inclusion criteria  
20 178 outlined above. The full-texts of the studies will be retrieved and independently assessed for  
21 179 eligibility. Any disagreement or uncertainty over the eligibility of particular studies will be resolved  
22 180 through discussion by two independent researchers.

23  
24  
25 181 *Data management and collection:* Rayyan QCRI (<https://rayyan.qcri.org/welcome>), the online  
26 182 systematic review tool, will be used to manage and screen all retrieved papers. AJW will be the solo  
27 183 team member responsible for adding or amending paper records in Rayyan, as well as identifying  
28 184 and removing duplicates. A second independent reviewer will be given access to all titles and  
29 185 abstracts, within Rayyan. They will be able to make their own decision as to whether to include or  
30 186 exclude a paper, blind to AJW's decisions. AJW will also be blind to the decisions of the second  
31 187 reviewer until all titles and abstracts are reviewed. Rayyan will provide information on the original  
32 188 number of titles screened, duplications, those excluded at this stage, and those included titles at this  
33 189 stage.

34  
35  
36  
37 190 Those papers which reach full-text screening will be managed within Zotero  
38 191 (<https://www.zotero.org/>), the bibliographic software. These will be sectioned by those included at  
39 192 full-text screening, and final inclusion. Reason for exclusion will be reported for each paper. AJW will  
40 193 be responsible for liaising with inter-library loans and obtaining the full-text papers. Full-text  
41 194 screening will again be conducted by two researchers, blind to each other's decisions, who will  
42 195 resolve disagreements through discussion. If an agreement cannot be reached regarding a paper,  
43 196 this will be rated by a third researcher.

44  
45  
46  
47 197 A pre-piloted standardised data extraction tool will be adapted and used on included studies[56].  
48 198 Extracted information will include: 1) author and publication date; 2) study design and setting; 3)  
49 199 characteristics of participants (age, gender identity), and the studies' inclusion and exclusion criteria;  
50 200 4) method of harm (self-harm, suicidal behaviour or ideation); 5) factors associated with or  
51 201 predictive of self-harm or suicidal ideation and behaviour (including clinician diagnosis, subscales or  
52 202 validated scales used to assess these items); 6) information relating to risk of bias for the individual  
53 203 study.

54  
55  
56  
57 204 *Risk of bias (quality assessment):* The overall quality of each study will be evaluated by two  
58 205 independent researchers using the Newcastle-Ottawa Scale (NOS)[47] and the Newcastle-Ottawa  
59 206 Scale adapted for cross-sectional studies[48]. Alternative study designs which are not covered in

207 these versions of NOS, will be assessed using a pre-piloted version developed for a previous  
208 systematic review[57]. The level of agreement will be demonstrated by Cohen's Kappa and a  
209 Prevalence and Bias-Adjusted Kappa (PABAK) score.

210 *Data synthesis and assessment of heterogeneity:* Included studies will be presented by grouping risk  
211 types together (e.g. demographic, psychosocial, psychiatric or mental health etc.). The descriptive  
212 characteristics of each will be presented in tabular format, and the risks and outcomes of which will  
213 be discussed using narrative synthesis, following the ESRC guidelines[58]. The analysis will take place  
214 over four steps; 1) developing a theory of which factors influence LGBTQ+ young people, 2)  
215 synthesising the findings, 3) exploring whether there are relationships within the data and what  
216 these might be, 4) assessing the robustness of the synthesis.

217 If possible, a meta-analysis of risk factors for self-harm and suicidal ideation and behaviour using  
218 RevMan 5 ([https://community.cochrane.org/help/tools-and-software/revman-5/revman-5-](https://community.cochrane.org/help/tools-and-software/revman-5/revman-5-download)  
219 [download](https://community.cochrane.org/help/tools-and-software/revman-5/revman-5-download)) may be conducted by pooling data on risk factors using a random-effects model with the  
220 assumption that populations have various effect sizes and weights studies from in- and between-  
221 study variance. These risks will be pooled based on the analysis which has taken place in the original  
222 paper, if a risk appears in more than one type of analysis it will be included in both analyses. These  
223 will consider the extent of heterogeneity, which will be determined using the  $I^2$  statistic. From this, a  
224 summary effect will be presented, associated 95% CI and  $p$  values. Odds ratio (OR) with 95%  
225 confidence intervals will present the overall synthesised measure of effect size. Publication bias will  
226 be assessed using funnel plots and Harbord-Egger test[57].

227 Additionally, consideration will be given to subgroup analysis if data allows, exploring heterogeneity  
228 by sexual and gender minorities; such that these studies are split by LGBQ and transgender; as even  
229 within this population it is recognised that the transgender population have high levels of suicide risk  
230 and self-harm[42, 58]. This will allow us to determine which risk factors are similar within sexual and  
231 gender minorities, and those that unique to the transgender population. Further examination of risk  
232 factors will be conducted by age difference, split by 12-18years and 19-25years.

233 The quality of the included studies will be considered when synthesising and analysing the findings in  
234 terms of the strength of evidence which they provide. A sensitivity analysis will be run to assess the  
235 robustness of included studies[59], following the removal of papers which score lower than 70% on  
236 quality assessment scales.

237 *Patient and Public Involvement:* No patients involved.

238

## 239 **ETHICS AND DISSEMINATION**

240 This is a systematic review of published literature and thereby ethical approval was not sought. It  
241 will be submitted to a peer-reviewed journal, be publicly disseminated at conferences focusing on  
242 mental health, self-harm and suicide prevention. Findings will also be shared through public  
243 engagement and involvement, particularly considering young LGBTQ+ individuals.

244

1  
2  
3 245 **DISCUSSION**  
4

5 246 This systematic review will be the first to provide a rich, holistic account of the existing evidence of  
6 247 risk factors for self-harm and suicidality within a broad sample of LGBTQ+ young people. The  
7 248 synthesis of these findings will assess the prevalence of particular factors which impact this  
8 249 population, which may not be relevant to non-sexual or gender minority young people. However,  
9 250 when pooling studies within a meta-analysis, it is possible that the variation between papers may  
10 251 cause a challenge for this synthesis. This may be related to the broad approach in which we're  
11 252 approaching the systematic review, nonetheless we feel that this approach offers many values. Such  
12 253 as, exploring the similarities and differences of risk factors by subgroup analysis, via sexual  
13 254 orientation and gender identity or age, could be used as a valuable stepping stone when considering  
14 255 LGBTQ+ research and promoting more applicable research aims.

15  
16  
17  
18  
19 256 The quality and strength of the evidence will be rigorously assessed, which could be used to inform  
20 257 future research targeting these particular risks. This could ultimately help to inform self-harm and  
21 258 suicidality prevention within LGBTQ+ young people. It is anticipated that the findings of this review  
22 259 will be of interest to the wider academic and clinical community, policymakers, young people who  
23 260 identify as a sexual or gender minority, those with experience of self-harm or suicide.  
24  
25

26 261

27  
28 262 **AUTHORS CONTRIBUTIONS**  
29

30 263 AJW, JA, ET, and MM conceptualised the study. AJW developed the search strategy and conducted  
31 264 the literature search. AJW and MM wrote the first draft of the manuscript. AJW, JA, ET, and MM  
32 265 authors reviewed, edited, and approved the final manuscript.  
33  
34

35 266

36  
37 267 **FUNDING STATEMENT**  
38

39 268 This work was supported by the Midlands Graduate School ESRC DTP Joint Studentship awarded to  
40 269 A. Jess Williams. The funding body were not involved in the development of this protocol.  
41  
42

43 270

44  
45 271 **COMPETING INTERESTS**  
46

47 272 None declared.  
48  
49  
50  
51  
52  
53  
54  
55  
56  
57  
58  
59  
60

## 273 REFERENCES

- 1  
2  
3  
4  
5  
6  
7  
8  
9  
10  
11  
12  
13  
14  
15  
16  
17  
18  
19  
20  
21  
22  
23  
24  
25  
26  
27  
28  
29  
30  
31  
32  
33  
34  
35  
36  
37  
38  
39  
40  
41  
42  
43  
44  
45  
46  
47  
48  
49  
50  
51  
52  
53  
54  
55  
56  
57  
58  
59  
60
- 274 1. American Psychiatric Association. Diagnostic and statistical manual of mental disorders  
275 (DSM-5®). American Psychiatric Pub; 2013 May 22.
  - 276 2. World Health Organization. Suicide across the world. 2016. Available from:  
277 [https://www.who.int/mental\\_health/prevention/suicide/suicideprevent/en/](https://www.who.int/mental_health/prevention/suicide/suicideprevent/en/). Accessed 7  
278 January 2019.
  - 279 3. Office for National Statistics. Suicides in the United Kingdom, 2017 Registration – ONS. 2018.  
280 Available at: <https://www.ons.gov.uk/releases/suicidesintheuk2017registrations>. Accessed  
281 27 Feb. 2019.
  - 282 4. National Collaborating Centre for Mental Health. Self-harm: Longer Term Management  
283 (NICE Clinical Guideline 133). London: National Institute for Clinical Excellence 2011.
  - 284 5. Hawton, K., Saunders, K.E. and O'Connor, R.C., 2012. Self-harm and suicide in  
285 adolescents. *The Lancet*, 379(9834), pp.2373-2382.
  - 286 6. McManus S, Bebbington P, Jenkins R et al. Mental health and wellbeing in England: Adult  
287 Psychiatric Morbidity Survey 2014. Leeds: NHS Digital. 2016. Available  
288 at <http://digital.nhs.uk/catalogue/PUB21748>. [Accessed 27 Feb. 2019]
  - 289 7. Sakinofsky I. Repetition of suicidal behaviour. In: Hawton K, and Van Heeringen K eds. The  
290 International Handbook of Suicide and Attempted Suicide. Chichester: John Wiley & Sons  
291 Ltd, 2000:385–404.
  - 292 8. Hawton K, Bergen H, Cooper J, et al. Suicide following self-harm: findings from the  
293 Multicentre Study of self-harm in England, 2000–2012. *Journal of Affective Disorders*. 2015  
294 April;(175):147-151.
  - 295 9. Rodway C, Tham SG, Ibrahim S, et al. Suicide in children and young people in England: a  
296 consecutive case series. *The Lancet Psychiatry*. 2016 Aug 1;3(8):751-9.
  - 297 10. Jourian TJ. Evolving nature of sexual orientation and gender identity. *New Directions for*  
298 *Student Services*. 2015 Dec;(152):11-23.
  - 299 11. King M, Semlyen J, Tai SS, Killaspy H, Osborn D, Popelyuk D, Nazareth I. A systematic review  
300 of mental disorder, suicide, and deliberate self harm in lesbian, gay and bisexual people.  
301 *BMC psychiatry*. 2008 Dec;8(1):70.
  - 302 12. Plöderl M, Wagenmakers EJ, Tremblay P, Ramsay R, Kralovec K, Fartacek C, Fartacek R.  
303 Suicide risk and sexual orientation: a critical review. *Archives of Sexual Behavior*. 2013 Jul  
304 1;42(5):715-27.
  - 305 13. Hottes TS, Bogaert L, Rhodes AE, et al. Lifetime prevalence of suicide attempts among sexual  
306 minority adults by study sampling strategies: a systematic review and meta-analysis.  
307 *American journal of public health*. 2016 May;106(5):e1-2.
  - 308 14. Haas AP, Eliason M, Mays VM, Mathy RM, Cochran SD, D'Augelli AR, Silverman MM, Fisher  
309 PW, Hughes T, Rosario M, Russell ST. Suicide and suicide risk in lesbian, gay, bisexual, and  
310 transgender populations: Review and recommendations. *Journal of homosexuality*. 2010  
311 Dec 30;58(1):10-51.
  - 312 15. Richards C, Barker M. Sexuality and gender for mental health professionals: A practical  
313 guide. Sage; 2013 Oct 15.
  - 314 16. Whittle S, Turner L, Combs R, et al. Transgender EuroStudy: Legal Survey and Focus on the  
315 Transgender Experience of Health Care. Brussels, Belgium: ILGA Europe; 2008.  
316 <http://tgeu.org/sites/default/files/eurostudy.pdf>. Accessed 26 March 2019

- 1  
2  
3 317 17. Bauer GR, Pyne J, Francino MC, et al. Suicidality among trans people in Ontario: implications  
4 318 for social work and social justice/La suicidabilité parmi les personnes trans en Ontario:  
5 319 implications en travail social et en justice sociale. *Serv Soc.* 2013;59:35–62.  
6 320  
7 321 18. Motmans J, de Biolley I, Debunne S. Being Transgender in Belgium: Mapping the Social and  
8 322 Legal Situation of Transgender People. Brussels: Institute for the Equality of Women and  
9 323 Men; 2010. [http://igvmiefh.belgium.be/nl/binaries/34%20-%20Transgender\\_ENG\\_tcm336-](http://igvmiefh.belgium.be/nl/binaries/34%20-%20Transgender_ENG_tcm336-99783.pdf)  
10 323 99783.pdf. Accessed 26 March 2019  
11 324  
12 325 19. Grant JM, Mottet LA, Tanis J, et al. Injustice at Every Turn: A Report of the National  
13 326 Transgender Discrimination Survey. Washington, D.C.: National Center for Transgender  
14 327 Equality and National Gay and Lesbian Task Force; 2011.  
15 327 [http://www.thetaskforce.org/downloads/reports/reports/ntds\\_full.pdf](http://www.thetaskforce.org/downloads/reports/reports/ntds_full.pdf). Accessed 26 March  
16 328 2019.  
17 329  
18 329 20. McNeil J, Bailey L, Ellis S, et al. Mental Health Study 2012. Edinburgh: Equality Network;  
19 330 2012. [http://www.scottishtrans.org/Uploads/Resources/trans\\_mh\\_study.pdf](http://www.scottishtrans.org/Uploads/Resources/trans_mh_study.pdf). Accessed 26  
20 331 March 2019.  
21 332  
22 333 21. Nock MK, Borges G, Bromet EJ, et al. Cross-national prevalence and risk factors for suicidal  
23 334 ideation, plans and attempts. *The British Journal of Psychiatry.* 2008 Feb;192(2):98-105.  
24 335  
25 336 22. Gratz KL. Risk factors for and functions of deliberate self-harm: An empirical and conceptual  
26 337 review. *Clinical Psychology: Science and Practice.* 2003 Jun;10(2):192-205.  
27 338  
28 339 23. Fliege H, Lee JR, Grimm A, et al. Risk factors and correlates of deliberate self-harm behavior:  
29 340 A systematic review. *Journal of psychosomatic research.* 2009 Jun 1;66(6):477-93.  
30 341  
31 342 24. Gili, M., Castellvi, P., Vives, M., de la Torre-Luque, A., Almenara, J., Blasco, M.J., Cebrià, A.I.,  
32 343 Gabilondo, A., Pérez-Ara, M.A., Lagares, C. and Parés-Badell, O., 2018. Mental disorders as  
33 344 risk factors for suicidal behavior in young people: A meta-analysis and systematic review of  
34 345 longitudinal studies. *Journal of affective disorders.*  
35 346  
36 347 25. Hawton K, James A. Suicide and deliberate self harm in young people. *BMJ.*  
37 348 2005;330(7496):891–4.  
38 349  
39 350 26. Semlyen J, King M, Varney J, et al. Sexual orientation and symptoms of common mental  
40 351 disorder or low wellbeing: combined meta-analysis of 12 UK population health surveys. *BMC*  
41 352 *psychiatry.* 2016 Dec;16(1):67.  
42 353  
43 354 27. Clements-Nolle K, Marx R, Katz M. Attempted suicide among transgender persons: The  
44 355 influence of gender-based discrimination and victimization. *Journal of homosexuality.* 2006  
45 356 Oct 11;51(3):53-69.  
46 357  
47 358 28. Meyer IH. Minority stress and mental health in gay men. *Journal of health and social*  
48 359 *behavior.* 1995 Mar;1:38-56.  
49 360  
50 361 29. Meyer IH. Prejudice, social stress, and mental health in lesbian, gay, and bisexual  
51 362 populations: conceptual issues and research evidence. *Psychological bulletin.* 2003  
52 363 Sep;129(5):674.  
53 364  
54 365 30. Cochran SD, Mays VM. Lifetime prevalence of suicide symptoms and affective disorders  
55 366 among men reporting same-sex sexual partners: results from NHANES III. *American journal*  
56 367 *of public health.* 2000 Apr;90(4):573.  
57 368  
58 369 31. Bontempo DE, d'Augelli AR. Effects of at-school victimization and sexual orientation on  
59 370 lesbian, gay, or bisexual youths' health risk behavior. *Journal of Adolescent Health.* 2002  
60 371 May 1;30(5):364-74.  
61 372  
62 373 32. Grossman AH, D'augelli AR, Frank JA. Aspects of psychological resilience among transgender  
youth. *Journal of LGBT Youth.* 2011 Mar 29;8(2):103-15.

1  
2  
3  
4  
5  
6  
7  
8  
9  
10  
11  
12  
13  
14  
15  
16  
17  
18  
19  
20  
21  
22  
23  
24  
25  
26  
27  
28  
29  
30  
31  
32  
33  
34  
35  
36  
37  
38  
39  
40  
41  
42  
43  
44  
45  
46  
47  
48  
49  
50  
51  
52  
53  
54  
55  
56  
57  
58  
59  
60

- 363 33. Brandelli Costa A, Pasley A, Machado WD, et al. The experience of sexual stigma and the  
364 increased risk of attempted suicide in young Brazilian people from low socioeconomic group.  
365 *Frontiers in psychology*. 2017 Feb 22;8:192.
- 366 34. Kelleher C. Minority stress and health: Implications for lesbian, gay, bisexual, transgender,  
367 and questioning (LGBTQ) young people. *Counselling psychology quarterly*. 2009 Dec  
368 1;22(4):373-9.
- 369 35. Taliaferro LA, Muehlenkamp JJ. Nonsuicidal self-injury and suicidality among sexual minority  
370 youth: risk factors and protective connectedness factors. *Academic pediatrics*. 2017 Sep  
371 1;17(7):715-22.
- 372 36. Puckett, J.A., Newcomb, M.E., Ryan, D.T., Swann, G., Garofalo, R. and Mustanski, B., 2017.  
373 Internalized homophobia and perceived stigma: A validation study of stigma measures in a  
374 sample of young men who have sex with men. *Sexuality Research and Social Policy*, 14(1),  
375 pp.1-16.
- 376 37. McDermott E, Hughes E, Rawlings V. The social determinants of lesbian, gay, bisexual and  
377 transgender youth suicidality in England: a mixed methods study. *Journal of Public Health*.  
378 2017 Oct 17;40(3):e244-51.
- 379 38. Klonsky ED. The functions of deliberate self-injury: A review of the evidence. *Clinical*  
380 *psychology review*. 2007 Mar 1;27(2):226-39.
- 381 39. Skegg K. Self-harm. *The Lancet*. 2005 Oct 22;366(9495):1471-83.
- 382 40. Edmondson AJ, Brennan CA, House AO. Non-suicidal reasons for self-harm: a systematic  
383 review of self-reported accounts. *Journal of Affective Disorders*. 2016 Feb 1;191:109-17.
- 384 41. Marshall E, Claes L, Bouman WP, et al. Non-suicidal self-injury and suicidality in trans people:  
385 a systematic review of the literature. *International review of psychiatry*. 2016 Jan 2;28(1):58-  
386 69.
- 387 42. Miranda-Mendizábal, A., Castellví, P., Parés-Badell, O., Almenara, J., Alonso, I., Blasco, M.J.,  
388 Cebrià, A., Gabilondo, A., Gili, M., Lagares, C. and Piqueras, J.A., 2017. Sexual orientation and  
389 suicidal behaviour in adolescents and young adults: systematic review and meta-  
390 analysis. *The British Journal of Psychiatry*, 211(2), pp.77-87.
- 391 43. Marshal MP, Dietz LJ, Friedman MS, et al. Suicidality and depression disparities between  
392 sexual minority and heterosexual youth: A meta-analytic review. *Journal of adolescent*  
393 *health*. 2011 Aug 1;49(2):115-23.
- 394 44. E Mann G, Taylor A, Wren B, et al. Review of the literature on self-injurious thoughts and  
395 behaviours in gender-diverse children and young people in the United Kingdom. *Clinical child*  
396 *psychology and psychiatry*. 2018:1359104518812724.
- 397 45. Shamseer L, Moher D, Clarke M, et al. Preferred reporting items for systematic review and  
398 meta-analysis protocols (PRISMA-P) 2015: elaboration and explanation. *Bmj*. 2015 Jan  
399 2;349:g7647.
- 400 46. Wells G, Shea B, O'Connell D, et al. Newcastle-Ottawa quality assessment scale cohort  
401 studies. 2011. [http://www.ohri.ca/programs/clinical\\_epidemiology/oxford.asp](http://www.ohri.ca/programs/clinical_epidemiology/oxford.asp).
- 402 47. Herzog R, Álvarez-Pasquin MJ, Díaz C, et al. Are healthcare workers' intentions to vaccinate  
403 related to their knowledge, beliefs and attitudes? A systematic review. *BMC public health*.  
404 2013 Dec;13(1):154.
- 405 48. Arcelus J, Claes L, Witcomb GL, et al. Risk factors for non-suicidal self-injury among trans  
406 youth. *The Journal of Sexual Medicine*. 2016 Mar 1;13(3):402-12.



- 1  
2  
3 407 49. Beck AT, Steer RA, Ranieri WF. Scale for suicide ideation: psychometric properties of a  
4 408 self-report version. *Journal of clinical psychology*. 1988 Jul;44(4):499-505.  
5 409 50. Bostrom AG, Cronbach J. Development of a clinical instrument to estimate suicide risk. *Am J*  
6 410 *Psychiatry*. 1985 Jun 6;142(6):680-6.  
7 411 51. Muehlenkamp JJ, Gutierrez PM, Osman A, et al. Validation of the Positive and Negative  
8 412 Suicide Ideation (PANSI) Inventory in a diverse sample of young adults. *Journal of Clinical*  
9 413 *Psychology*. 2005 Apr;61(4):431-45.  
10 414 52. Posner K, Brown GK, Stanley B, et al. The Columbia–Suicide Severity Rating Scale: initial  
11 415 validity and internal consistency findings from three multisite studies with adolescents and  
12 416 adults. *American Journal of Psychiatry*. 2011 Dec;168(12):1266-77.  
13 417 53. Sansone RA, Wiederman MW, Sansone LA. The self-harm inventory (SHI): Development of a  
14 418 scale for identifying self-destructive behaviors and borderline personality disorder. *Journal*  
15 419 *of clinical psychology*. 1998 Nov;54(7):973-83.  
16 420 54. Nock MK, Holmberg EB, Photos VI, Michel BD. Self-Injurious Thoughts and Behaviors  
17 421 Interview: Development, reliability, and validity in an adolescent sample.  
18 422 55. Taylor PJ, Dhingra K, Dickson JM, et al. Psychological correlates of self-harm within gay,  
19 423 lesbian and bisexual UK University students. *Archives of suicide research*. 2018 Sep 28:1-6.  
20 424 56. Knipe D, Williams AJ, Hannan-Swain S, et al. Psychiatric morbidity and suicidal behaviour in  
21 425 low and middle-income countries: A systematic review and meta-analysis. (*in press*)  
22 426 57. Harbord RM, Egger M, Sterne JA. A modified test for small-study effects in meta-analyses of  
23 427 controlled trials with binary endpoints. *Statistics in medicine*. 2006 Oct 30;25(20):3443-57.  
24 428 58. Popay J, Roberts H, Sowden A, et al. Guidance on the conduct of narrative synthesis in  
25 429 systematic reviews. A product from the ESRC methods programme Version. 2006 Apr  
26 430 1;1:b92.  
27 431 59. Deeks JJ, Higgins JP, Altman DG. Analysing data and undertaking meta-analyses. *Cochrane*  
28 432 *handbook for systematic reviews of interventions: Cochrane book series*. 2008 Sep 26:243-  
29 433 96.  
30  
31  
32  
33  
34  
35  
36  
37  
38 434

## PRISMA-P 2015 Checklist

This checklist has been adapted for use with protocol submissions to *Systematic Reviews* from Table 3 in Moher D et al: Preferred reporting items for systematic review and meta-analysis protocols (PRISMA-P) 2015 statement. *Systematic Reviews* 2015 4:1

| Section/topic                     | #  | Checklist item                                                                                                                                                                                  | Information reported                |                                     | Line number(s) |
|-----------------------------------|----|-------------------------------------------------------------------------------------------------------------------------------------------------------------------------------------------------|-------------------------------------|-------------------------------------|----------------|
|                                   |    |                                                                                                                                                                                                 | Yes                                 | No                                  |                |
| <b>ADMINISTRATIVE INFORMATION</b> |    |                                                                                                                                                                                                 |                                     |                                     |                |
| <b>Title</b>                      |    |                                                                                                                                                                                                 |                                     |                                     |                |
| Identification                    | 1a | Identify the report as a protocol of a systematic review                                                                                                                                        | <input checked="" type="checkbox"/> | <input type="checkbox"/>            | 1              |
| Update                            | 1b | If the protocol is for an update of a previous systematic review, identify as such                                                                                                              | <input type="checkbox"/>            | <input checked="" type="checkbox"/> |                |
| <b>Registration</b>               | 2  | If registered, provide the name of the registry (e.g., PROSPERO) and registration number in the Abstract                                                                                        | <input checked="" type="checkbox"/> | <input type="checkbox"/>            | 48             |
| <b>Authors</b>                    |    |                                                                                                                                                                                                 |                                     |                                     |                |
| Contact                           | 3a | Provide name, institutional affiliation, and e-mail address of all protocol authors; provide physical mailing address of corresponding author                                                   | <input checked="" type="checkbox"/> | <input type="checkbox"/>            | 4-20           |
| Contributions                     | 3b | Describe contributions of protocol authors and identify the guarantor of the review                                                                                                             | <input checked="" type="checkbox"/> | <input type="checkbox"/>            | 262-265        |
| <b>Amendments</b>                 | 4  | If the protocol represents an amendment of a previously completed or published protocol, identify as such and list changes; otherwise, state plan for documenting important protocol amendments | <input type="checkbox"/>            | <input checked="" type="checkbox"/> |                |
| <b>Support</b>                    |    |                                                                                                                                                                                                 |                                     |                                     |                |
| Sources                           | 5a | Indicate sources of financial or other support for the review                                                                                                                                   | <input checked="" type="checkbox"/> | <input type="checkbox"/>            | 267-269        |
| Sponsor                           | 5b | Provide name for the review funder and/or sponsor                                                                                                                                               | <input checked="" type="checkbox"/> | <input type="checkbox"/>            | 268            |
| Role of sponsor/funder            | 5c | Describe roles of funder(s), sponsor(s), and/or institution(s), if any, in developing the protocol                                                                                              | <input checked="" type="checkbox"/> | <input type="checkbox"/>            | 269            |
| <b>INTRODUCTION</b>               |    |                                                                                                                                                                                                 |                                     |                                     |                |
| <b>Rationale</b>                  | 6  | Describe the rationale for the review in the context of what is already known                                                                                                                   | <input checked="" type="checkbox"/> | <input type="checkbox"/>            | 60-112         |
| <b>Objectives</b>                 | 7  | Provide an explicit statement of the question(s) the review will address with reference to participants, interventions, comparators, and outcomes (PICO)                                        | <input checked="" type="checkbox"/> | <input type="checkbox"/>            | 113-118        |

| Section/topic                             | #   | Checklist item                                                                                                                                                                                                                              | Information reported |                          | Line number(s) |
|-------------------------------------------|-----|---------------------------------------------------------------------------------------------------------------------------------------------------------------------------------------------------------------------------------------------|----------------------|--------------------------|----------------|
|                                           |     |                                                                                                                                                                                                                                             | Yes                  | No                       |                |
| <b>METHODS</b>                            |     |                                                                                                                                                                                                                                             |                      |                          |                |
| <b>Eligibility criteria</b>               | 8   | Specify the study characteristics (e.g., PICO, study design, setting, time frame) and report characteristics (e.g., years considered, language, publication status) to be used as criteria for eligibility for the review                   | √                    | <input type="checkbox"/> | 128-163        |
| <b>Information sources</b>                | 9   | Describe all intended information sources (e.g., electronic databases, contact with study authors, trial registers, or other grey literature sources) with planned dates of coverage                                                        | √                    | <input type="checkbox"/> | 165-174        |
| <b>Search strategy</b>                    | 10  | Present draft of search strategy to be used for at least one electronic database, including planned limits, such that it could be repeated                                                                                                  | √                    | <input type="checkbox"/> | Sup file 2     |
| <b>STUDY RECORDS</b>                      |     |                                                                                                                                                                                                                                             |                      |                          |                |
| Data management                           | 11a | Describe the mechanism(s) that will be used to manage records and data throughout the review                                                                                                                                                | √                    | <input type="checkbox"/> | 181-203        |
| Selection process                         | 11b | State the process that will be used for selecting studies (e.g., two independent reviewers) through each phase of the review (i.e., screening, eligibility, and inclusion in meta-analysis)                                                 | √                    | <input type="checkbox"/> | 176-180        |
| Data collection process                   | 11c | Describe planned method of extracting data from reports (e.g., piloting forms, done independently, in duplicate), any processes for obtaining and confirming data from investigators                                                        | √                    | <input type="checkbox"/> | 181-203        |
| <b>Data items</b>                         | 12  | List and define all variables for which data will be sought (e.g., PICO items, funding sources), any pre-planned data assumptions and simplifications                                                                                       | √                    | <input type="checkbox"/> | 197-203        |
| <b>Outcomes and prioritization</b>        | 13  | List and define all outcomes for which data will be sought, including prioritization of main and additional outcomes, with rationale                                                                                                        | √                    | <input type="checkbox"/> | 148-162        |
| <b>Risk of bias in individual studies</b> | 14  | Describe anticipated methods for assessing risk of bias of individual studies, including whether this will be done at the outcome or study level, or both; state how this information will be used in data synthesis                        | √                    | <input type="checkbox"/> | 217-226        |
| <b>DATA</b>                               |     |                                                                                                                                                                                                                                             |                      |                          |                |
| <b>Synthesis</b>                          | 15a | Describe criteria under which study data will be quantitatively synthesized                                                                                                                                                                 | √                    | <input type="checkbox"/> | 210-216        |
|                                           | 15b | If data are appropriate for quantitative synthesis, describe planned summary measures, methods of handling data, and methods of combining data from studies, including any planned exploration of consistency (e.g., $I^2$ , Kendall's tau) | √                    | <input type="checkbox"/> | 217-226        |
|                                           | 15c | Describe any proposed additional analyses (e.g., sensitivity or subgroup analyses, meta-regression)                                                                                                                                         | √                    | <input type="checkbox"/> | 227-232        |
|                                           | 15d | If quantitative synthesis is not appropriate, describe the type of summary planned                                                                                                                                                          | √                    | <input type="checkbox"/> | 210-216        |

1  
2  
3  
4  
5  
6  
7  
8  
9  
10  
11  
12  
13  
14  
15  
16  
17  
18  
19  
20  
21  
22  
23  
24  
25  
26  
27  
28  
29  
30  
31  
32  
33  
34  
35  
36  
37  
38  
39  
40  
41  
42  
43  
44  
45  
46

| Section/topic                     | #  | Checklist item                                                                                                              | Information reported |                          | Line number(s) |
|-----------------------------------|----|-----------------------------------------------------------------------------------------------------------------------------|----------------------|--------------------------|----------------|
|                                   |    |                                                                                                                             | Yes                  | No                       |                |
| Meta-bias(es)                     | 16 | Specify any planned assessment of meta-bias(es) (e.g., publication bias across studies, selective reporting within studies) | √                    | <input type="checkbox"/> | 217-226        |
| Confidence in cumulative evidence | 17 | Describe how the strength of the body of evidence will be assessed (e.g., GRADE)                                            | √                    | <input type="checkbox"/> | 233-236        |

For peer review only

**SUPPLEMENTARY FILE 2****Search strategy terms:**

(self-harm OR self harm\* OR self-injur\* OR "self injur\*" OR self-cut\* OR self-destruct\* OR "self destruct\*" OR "nonsuicidal self-injur\*" OR "non-suicidal self injur\*" OR "deliberate self harm" OR "deliberate self-harm" OR DSH OR "self-mutil\*" OR overdos\* OR self-inflicted injur\* OR "self inflicted injur\*" OR suicid\* OR "parasuicid\*" OR para-suicid\* OR parasuicid\* OR suicidal behav\* OR suicide\* OR "life-threatening behavio\*" OR "suicide ideat\*" OR "suicide attempt\*" OR "attempted suicide\*" OR NSSI)

AND

(moderat\* OR mediat\* OR "risk facto\*" OR mechan\* OR predict\* OR pathway OR interact\* OR "protective facto\*" OR facto\* OR influence OR correlate\* OR precurs\* OR "causal facto\*")

AND

(transgender\* OR transsexual\* OR "gender nonconforming" OR "gender identity disorder" OR "gender dysphoria" OR "gender minority" OR lesbian\* OR gay\* OR bisexual\* OR "sexual minority" OR "same-sex" OR homosexual\* OR "homosexuality, male" OR "homosexuality, female" OR "gender identity" OR non-heterosexual\* OR "non heterosexual\*" OR homosexuality OR queer\* OR questioning OR "non-binary" OR "non binary" OR "LGBT\*" OR "sexual dissident\*" OR "sexual and gender minorities" OR "gender variant" OR gender-variant OR genderqueer OR intersex OR "minority groups" OR "TGNC" OR "transgender and gender nonconforming")

AND

(Child\* OR adolesc\* OR "young people" OR kid\* OR pupils OR youth OR juvenile OR "young adult\*" OR "young person" OR minor\*)
