# Supplementary material for: Examining risk factors for self-harm and suicide in LGBTQ+ young people: a systematic review protocol
Source: PubMed Central journal article supplement (PMC6858144; doi:10.1136/bmjopen-2019-031541), 2019-11-11
Supplement: bmjopen-2019-031541supp002.pdf [file bmjopen-2019-031541supp002.pdf]

**SUPPLEMENTARY FILE 2****Search strategy terms:**

(self-harm OR self harm\* OR self-injur\* OR "self injur\*" OR self-cut\* OR self-destruct\* OR "self destruct\*" OR "nonsuicidal self-injur\*" OR "non-suicidal self injur\*" OR "deliberate self harm" OR "deliberate self-harm" OR DSH OR "self-mutil\*" OR overdos\* OR self-inflicted injur\* OR "self inflicted injur\*" OR suicid\* OR "parasuicid\*" OR para-suicid\* OR parasuicid\* OR suicidal behav\* OR suicide\* OR "life-threatening behavio\*" OR "suicide ideat\*" OR "suicide attempt\*" OR "attempted suicide\*" OR NSSI)

AND

(moderat\* OR mediat\* OR "risk facto\*" OR mechan\* OR predict\* OR pathway OR interact\* OR "protective facto\*" OR facto\* OR influence OR correlate\* OR precurs\* OR "causal facto\*")

AND

(transgender\* OR transsexual\* OR "gender nonconforming" OR "gender identity disorder" OR "gender dysphoria" OR "gender minority" OR lesbian\* OR gay\* OR bisexual\* OR "sexual minority" OR "same-sex" OR homosexual\* OR "homosexuality, male" OR "homosexuality, female" OR "gender identity" OR non-heterosexual\* OR "non heterosexual\*" OR homosexuality OR queer\* OR questioning OR "non-binary" OR "non binary" OR "LGBT\*" OR "sexual dissident\*" OR "sexual and gender minorities" OR "gender variant" OR gender-variant OR genderqueer OR intersex OR "minority groups" OR "TGNC" OR "transgender and gender nonconforming")

AND

(Child\* OR adolesc\* OR "young people" OR kid\* OR pupils OR youth OR juvenile OR "young adult\*" OR "young person" OR minor\*)
